# Supplementary material for: Molecular-level interactions governed by temperature and composition in double salt ionic liquid-water systems
Source: Royal Society of Chemistry journal article supplement (doi:10.1039/d6ra00801a), 2026-06-04
Supplement: d6ra00801a1.pdf [file d6ra00801a1.pdf]

# Molecular-Level Interactions Governed by Temperature and Composition in Double Salt Ionic Liquid–Water Systems

K M Golam Rahman,<sup>a</sup> Mohammad Hossain,<sup>ab</sup> and Md. Abu Bin Hasan Susan<sup>\*ac</sup>

<sup>a</sup>Department of Chemistry, University of Dhaka, Dhaka 1000, Bangladesh;

<sup>b</sup>Department of Chemistry, Bangladesh University of Engineering and Technology (BUET), Dhaka 1000, Bangladesh;

<sup>c</sup>Dhaka University Nanotechnology Center (DUNC), University of Dhaka, Dhaka 1000, Bangladesh

\* Corresponding author. susan@du.ac.bd

## Electronic Supplementary Information

### Table of Contents

| No. of Fig.     | Caption of Figure                                                                                                                                                                                                                                           | Page |
|-----------------|-------------------------------------------------------------------------------------------------------------------------------------------------------------------------------------------------------------------------------------------------------------|------|
| <b>Fig. S1</b>  | Densities of $[C_4mim]BF_4$ , $[C_4mim][MeSO_4]$ , and $[C_4mim](BF_4)_{0.5}[MeSO_4]_{0.5}$ as a function of temperature.                                                                                                                                   | S4   |
| <b>Fig. S2</b>  | Arrhenius plot of $\ln(\eta)$ versus $1/T$ for $[C_4mim]BF_4$ , $[C_4mim][MeSO_4]$ , and $[C_4mim](BF_4)_{0.5}[MeSO_4]_{0.5}$ showing linear behavior over the studied temperature range and corresponding regression fits.                                 | S4   |
| <b>Table S1</b> | Arrhenius fitting parameters (intercept and slope) and corresponding coefficients of determination ( $R^2$ ) obtained from linear regression of $\ln(\eta)$ versus $1/T$ for $[C_4mim]BF_4$ , $[C_4mim][MeSO_4]$ , and $[C_4mim](BF_4)_{0.5}[MeSO_4]_{0.5}$ | S5   |
| <b>Fig. S3</b>  | Viscosities of $[C_4mim]BF_4$ , $[C_4mim][MeSO_4]$ , and $[C_4mim](BF_4)_{0.5}[MeSO_4]_{0.5}$ as a function of temperature with Vogel–Fulcher–Tammann (VFT) fitting.                                                                                        | S5   |
| <b>Table S2</b> | Vogel–Fulcher–Tammann (VFT) fitting parameters ( $A$ , $B$ , and $x_0$ ) and corresponding coefficients of determination ( $R^2$ ) obtained from fitting the temperature dependence of viscosity ( $\eta$ ) for $[C_4mim]BF_4$ , $[C_4mim][MeSO_4]$ , and   | S6   |

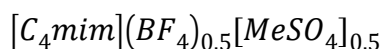

|                 |                                                                                                                                                                        |     |
|-----------------|------------------------------------------------------------------------------------------------------------------------------------------------------------------------|-----|
| <b>Fig. S4</b>  | Energy barrier values of $[C_4mim]BF_4$ , $[C_4mim][MeSO_4]$ , and $[C_4mim](BF_4)_{0.5}[MeSO_4]_{0.5}$ as a function of temperature.                                  | S6  |
| <b>Fig. S5</b>  | Changes in entropy of activation for the viscous flow of $[C_4mim]BF_4$ , $[C_4mim][MeSO_4]$ , and $[C_4mim](BF_4)_{0.5}[MeSO_4]_{0.5}$ as a function of temperature.  | S7  |
| <b>Fig. S6</b>  | Changes in enthalpy of activation for the viscous flow of $[C_4mim]BF_4$ , $[C_4mim][MeSO_4]$ , and $[C_4mim](BF_4)_{0.5}[MeSO_4]_{0.5}$ as a function of temperature. | S7  |
| <b>Fig. S7</b>  | Size of aggregates formed in pure $[C_4mim]BF_4$ at various temperatures.                                                                                              | S8  |
| <b>Fig. S8</b>  | Size of aggregates formed in pure $[C_4mim][MeSO_4]$ at various temperatures.                                                                                          | S8  |
| <b>Fig. S9</b>  | Size of aggregates formed in $[C_4mim](BF_4)_{0.5}[MeSO_4]_{0.5}$ at various temperatures.                                                                             | S9  |
| <b>Fig. S10</b> | NIR spectra of pure $[C_4mim]BF_4$ at various temperatures.                                                                                                            | S9  |
| <b>Fig. S11</b> | NIR spectra of pure $[C_4mim][MeSO_4]$ at various temperatures.                                                                                                        | S10 |
| <b>Fig. S12</b> | NIR spectra of pure $[C_4mim](BF_4)_{0.5}[MeSO_4]_{0.5}$ at various temperatures.                                                                                      | S10 |
| <b>Fig. S13</b> | Temperature-dependent (a) synchronous and (b) asynchronous 2D correlation spectra of pure $[C_4mim]BF_4$ .                                                             | S11 |
| <b>Fig. S14</b> | Temperature-dependent (a) synchronous and (b) asynchronous 2D correlation spectra of pure $[C_4mim][MeSO_4]$ .                                                         | S12 |
| <b>Fig. S15</b> | Temperature-dependent (a) synchronous and (b) asynchronous 2D correlation spectra of pure $[C_4mim](BF_4)_{0.5}[MeSO_4]_{0.5}$ .                                       | S13 |
| <b>Fig. S16</b> | Density as a function of temperature and mole fraction for $[C_4mim](BF_4)_{0.5}[MeSO_4]_{0.5}$ and water binary mixtures.                                             | S14 |

|                   |                                                                                                                                                                                                                                                                             |         |
|-------------------|-----------------------------------------------------------------------------------------------------------------------------------------------------------------------------------------------------------------------------------------------------------------------------|---------|
| <b>Fig. S17</b>   | Arrhenius plot of $\ln(\eta)$ versus $1/T$ for DSIL, $[C_4mim](BF_4)_{0.5}[MeSO_4]_{0.5}$ -water binary mixtures showing linear behavior over the studied temperature range and corresponding regression fits.                                                              | S15     |
| <b>Table S3</b>   | Arrhenius fitting parameters (intercept and slope) and corresponding coefficients of determination ( $R^2$ ) obtained from linear regression of $\ln(\eta)$ versus $1/T$ for $[C_4mim](BF_4)_{0.5}[MeSO_4]_{0.5}$ -water binary mixtures                                    | S15     |
| <b>Fig. S18</b>   | Viscosity as a function of (a) temperature with VFT fitting and (b) mole fraction for $[C_4mim](BF_4)_{0.5}[MeSO_4]_{0.5}$ -water mixtures.                                                                                                                                 | S16     |
| <b>Table S4</b>   | Vogel–Fulcher–Tammann (VFT) fitting parameters ( $A$ , $B$ , and $x_0$ ) and corresponding coefficients of determination ( $R^2$ ) obtained from fitting the temperature dependence of viscosity ( $\eta$ ) for $[C_4mim](BF_4)_{0.5}[MeSO_4]_{0.5}$ -water binary mixtures | S17     |
| <b>Fig. S19</b>   | Calculated energy barrier for DSIL and its component ILs.                                                                                                                                                                                                                   | S18     |
| <b>Table S5</b>   | Experimental densities ( $\rho$ ), dynamic viscosities ( $\eta$ ), calculated $V_m^E$ , partial molar volume ( $V_{m,1}$ ), and viscosity deviation ( $\Delta\eta$ ) for $[C_4mim](BF_4)_{0.5}[MeSO_4]_{0.5}$ -water binary mixtures at different temperatures              | S19     |
| <b>Fig. S20</b>   | (a) Free energy, (b) entropy, and (c) enthalpy changes of activation for viscous flow as a function of temperature and mole fraction for the binary mixtures of water and $[C_4mim](BF_4)_{0.5}[MeSO_4]_{0.5}$ .                                                            | S24     |
| <b>Fig. S21</b>   | Size distribution of aggregates formed in $[C_4mim](BF_4)_{0.5}[MeSO_4]_{0.5}$ -water binary mixture from $X_{DSIL} = 0.9$ to $0.1$ at $25\text{ }^\circ\text{C}$ .                                                                                                         | S25     |
| <b>Fig. S22</b>   | Size distribution of aggregates formed in $[C_4mim](BF_4)_{0.5}[MeSO_4]_{0.5}$ -water binary mixture for $X_{DSIL} = 0.9, 0.8, 0.7, 0.6, 0.5, 0.4, 0.3,$ and $0.1$ at several temperatures from $20$ to $40\text{ }^\circ\text{C}$ .                                        | S26-S27 |
| <b>Fig. S23</b>   | NIR spectra of pure water from $20$ to $70\text{ }^\circ\text{C}$ .                                                                                                                                                                                                         | S28     |
| <b>Fig. S24</b>   | NIR spectra of pure $[C_4mim](BF_4)_{0.5}[MeSO_4]_{0.5}$ from $20$ to $70\text{ }^\circ\text{C}$ .                                                                                                                                                                          | S28     |
| <b>Section S1</b> | 2D correlation Analysis of Pure Water                                                                                                                                                                                                                                       | S29     |
| <b>Fig. S25</b>   | (a) Synchronous and (b) asynchronous plot for pure water.                                                                                                                                                                                                                   | S29     |

|                 |                                                                                                                            |     |
|-----------------|----------------------------------------------------------------------------------------------------------------------------|-----|
| <b>Fig. S26</b> | (a) Synchronous and (b) asynchronous plot for pure $[C_4mim](BF_4)_{0.5}[MeSO_4]_{0.5}$ .                                  | S30 |
| <b>Fig. S27</b> | (a) Synchronous and (b) asynchronous plot for 0.9 $[C_4mim](BF_4)_{0.5}[MeSO_4]_{0.5}$ -water binary mixture.              | S31 |
| <b>Fig. S28</b> | Molecular-level interactions when (a) pure ILs are combined to form DSIL and (b) temperature increases gradually for DSIL. | S32 |

---

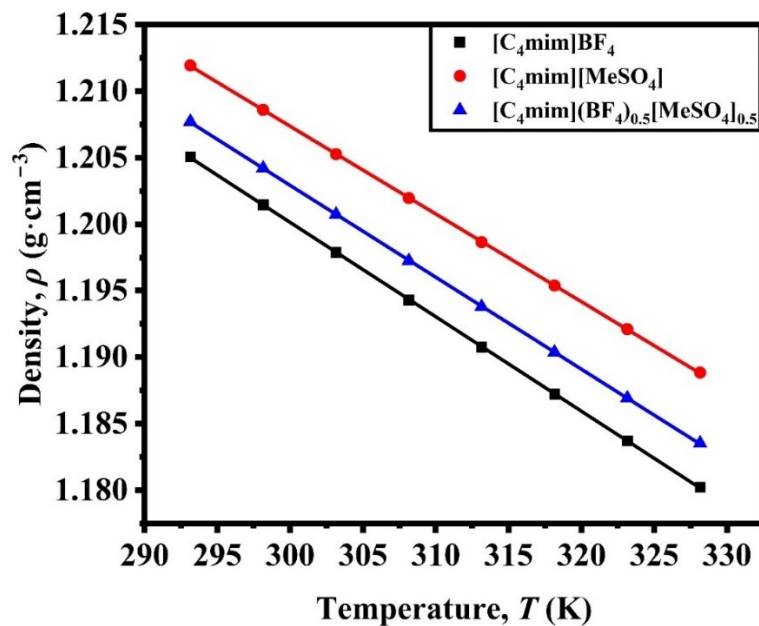

**Fig. S1** Densities of  $[C_4mim]BF_4$ ,  $[C_4mim][MeSO_4]$ , and  $[C_4mim](BF_4)_{0.5}[MeSO_4]_{0.5}$  as a function of temperature.

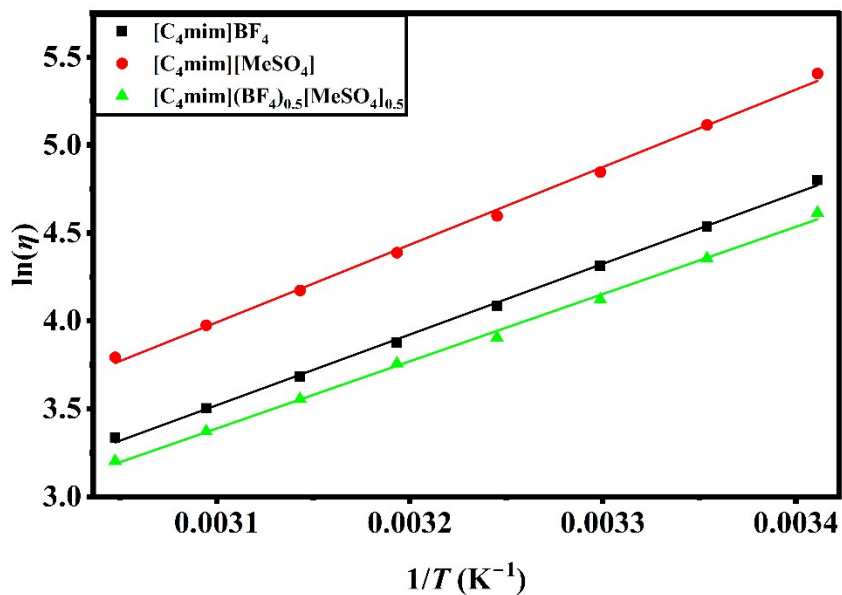

**Fig. S2** Arrhenius plot of  $\ln(\eta)$  versus  $1/T$  for  $[C_4mim]BF_4$ ,  $[C_4mim][MeSO_4]$ , and  $[C_4mim](BF_4)_{0.5}[MeSO_4]_{0.5}$  showing linear behavior over the studied temperature range and corresponding regression fits.

**Table S1.** Arrhenius fitting parameters (intercept and slope) and corresponding coefficients of determination ( $R^2$ ) obtained from linear regression of  $\ln(\eta)$  versus  $1/T$  for  $[C_4mim]BF_4$ ,  $[C_4mim][MeSO_4]$ , and  $[C_4mim](BF_4)_{0.5}[MeSO_4]_{0.5}$

| Ionic Liquids and Double Salt<br>Ionic Liquid | Intercept | Slope    | $R^2$ |
|-----------------------------------------------|-----------|----------|-------|
| $[C_4mim]BF_4$                                | -8.937    | 4018.598 | 0.998 |
| $[C_4mim][MeSO_4]$                            | -9.682    | 4411.155 | 0.997 |
| $[C_4mim](BF_4)_{0.5}[MeSO_4]_{0.5}$          | -8.457    | 3821.252 | 0.997 |

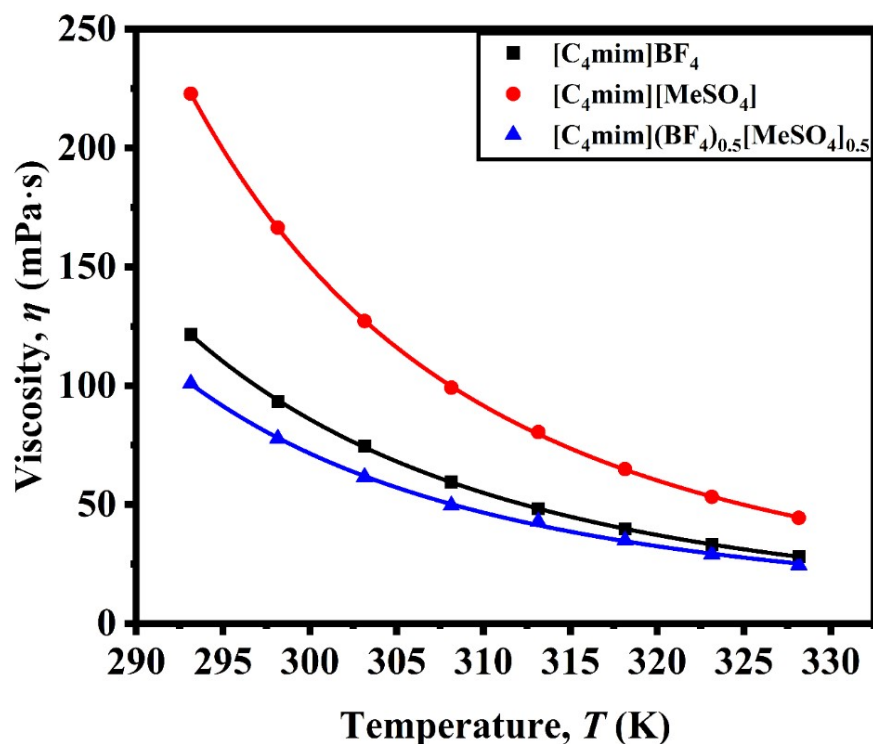

**Fig. S3** Viscosities of  $[C_4mim]BF_4$ ,  $[C_4mim][MeSO_4]$ , and  $[C_4mim](BF_4)_{0.5}[MeSO_4]_{0.5}$  as a function of temperature with Vogel–Fulcher–Tammann (VFT) fitting.

**Table S2.** Vogel–Fulcher–Tammann (VFT) fitting parameters ( $A$ ,  $B$ , and  $x_0$ ) and corresponding coefficients of determination ( $R^2$ ) obtained from fitting the temperature dependence of viscosity ( $\eta$ ) for  $[C_4mim]BF_4$ ,  $[C_4mim][MeSO_4]$ , and  $[C_4mim](BF_4)_{0.5}[MeSO_4]_{0.5}$

| Ionic Liquids and Double Salt Ionic Liquid | $A$    | $B$     | $x_0$   | $R^2$ |
|--------------------------------------------|--------|---------|---------|-------|
| $[C_4mim]BF_4$                             | -0.887 | 382.067 | 164.563 | 0.999 |
| $[C_4mim][MeSO_4]$                         | -0.442 | 292.877 | 188.194 | 0.999 |
| $[C_4mim](BF_4)_{0.5}[MeSO_4]_{0.5}$       | -0.317 | 232.191 | 193.095 | 0.999 |

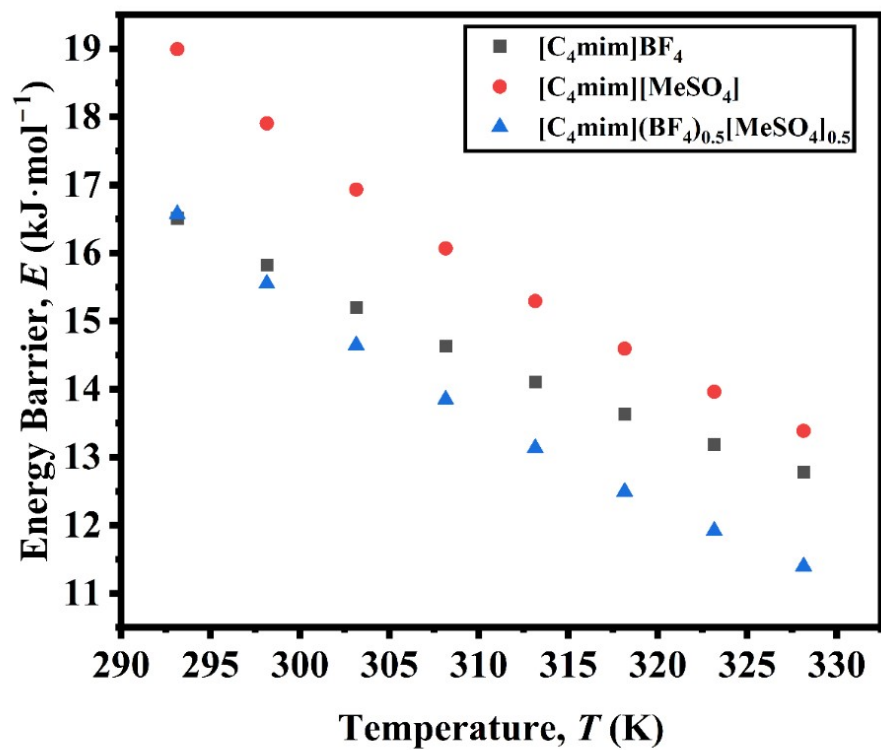

**Fig. S4** Energy barrier values of  $[C_4mim]BF_4$ ,  $[C_4mim][MeSO_4]$ , and  $[C_4mim](BF_4)_{0.5}[MeSO_4]_{0.5}$  as a function of temperature.

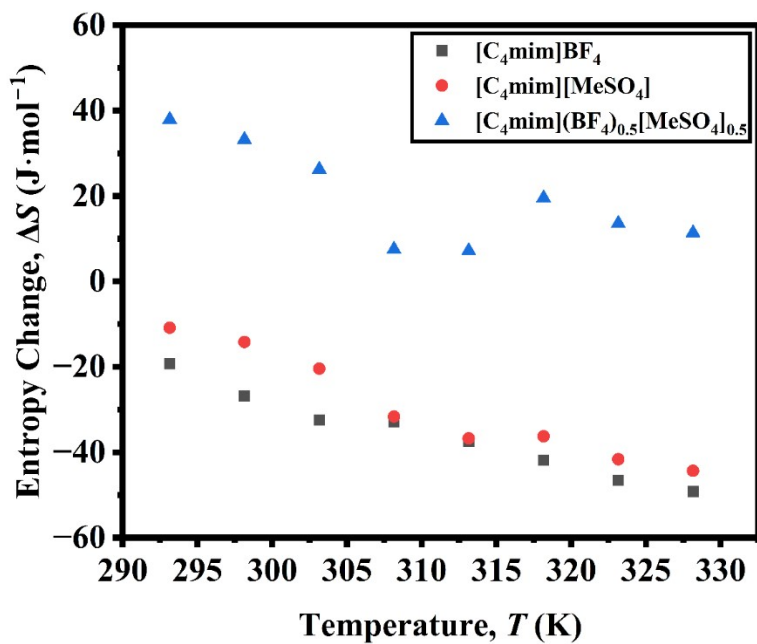

**Fig. S5** Changes in entropy of activation for the viscous flow of  $[C_4mim]BF_4$ ,  $[C_4mim][MeSO_4]$ , and  $[C_4mim](BF_4)_{0.5}[MeSO_4]_{0.5}$  as a function of temperature.

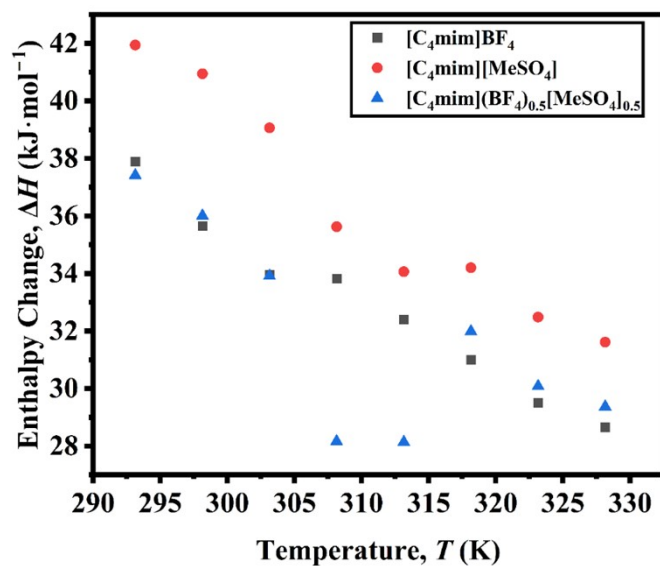

**Fig. S6** Changes in enthalpy of activation for the viscous flow of  $[C_4mim]BF_4$ ,  $[C_4mim][MeSO_4]$ , and  $[C_4mim](BF_4)_{0.5}[MeSO_4]_{0.5}$  as a function of temperature.

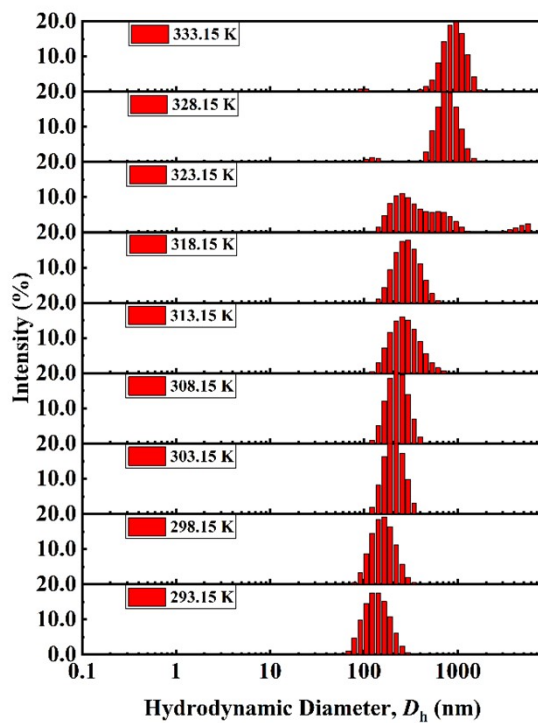

**Fig. S7** Size of aggregates formed in pure  $[C_4mim]BF_4$  at various temperatures.

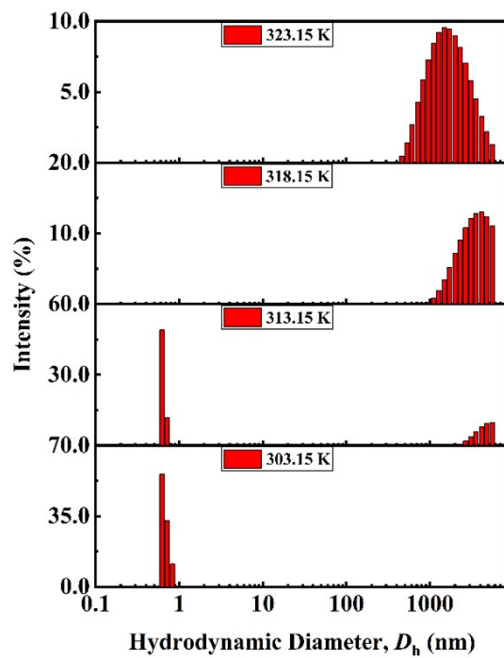

**Fig. S8** Size of aggregates formed in pure  $[C_4mim][MeSO_4]$  at various temperatures.

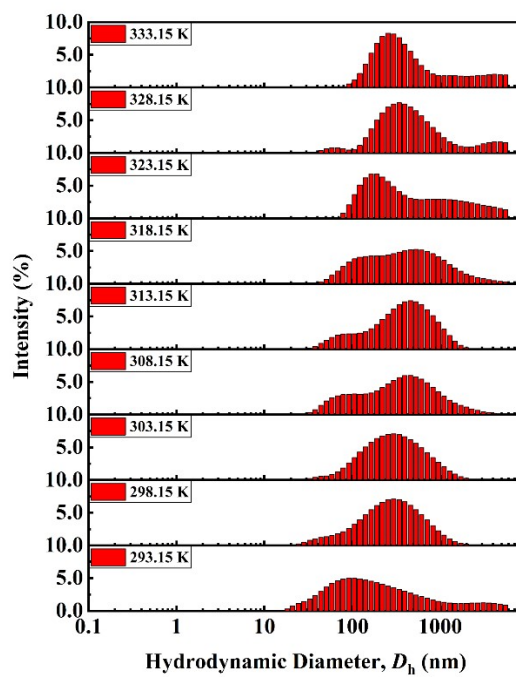

Fig. S9 Size of aggregates formed in  $[C_4mim](BF_4)_{0.5}[MeSO_4]_{0.5}$  at various temperatures.

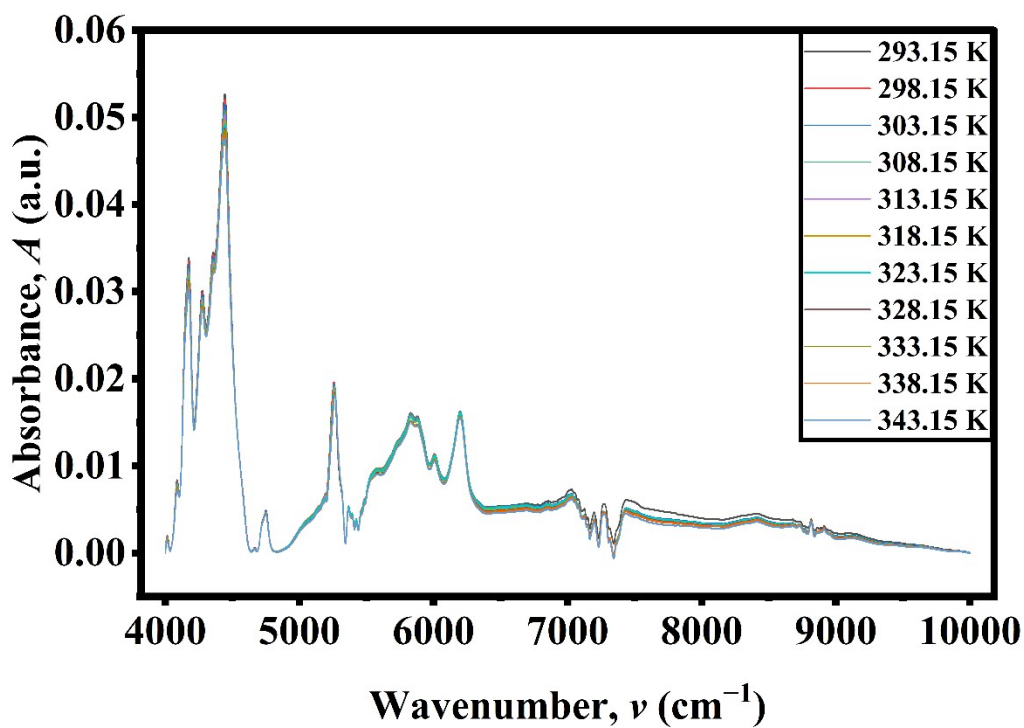

Fig. S10 NIR spectra of pure  $[C_4mim]BF_4$  at various temperatures.

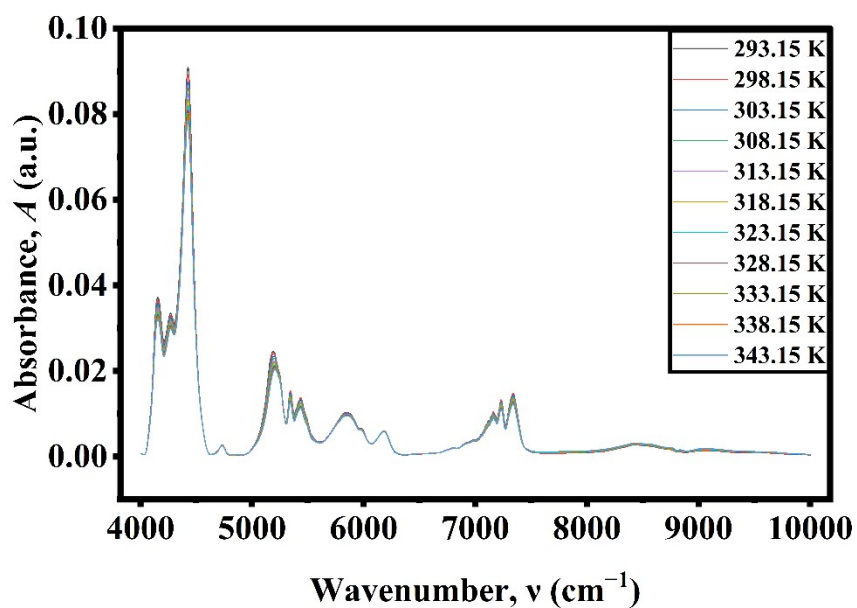

Fig. S11 NIR spectra of pure  $[C_4mim][MeSO_4]$  at various temperatures.

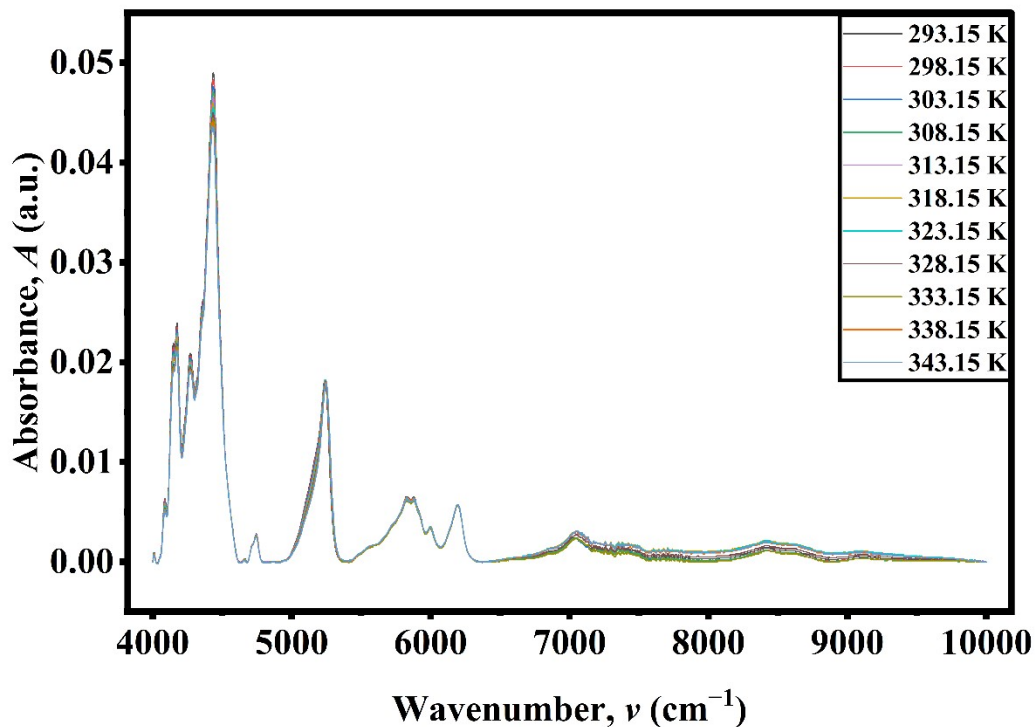

Fig. S12 NIR spectra of pure  $[C_4mim](BF_4)_{0.5}[MeSO_4]_{0.5}$  at various temperatures.

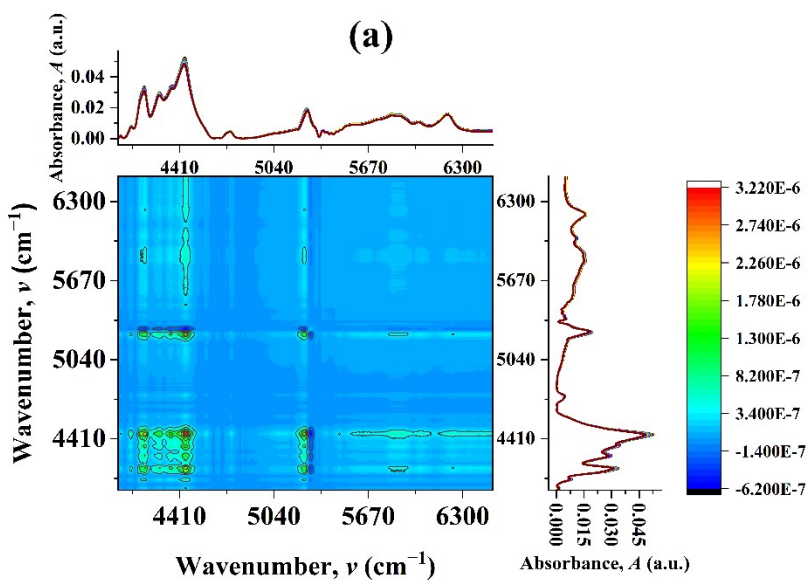

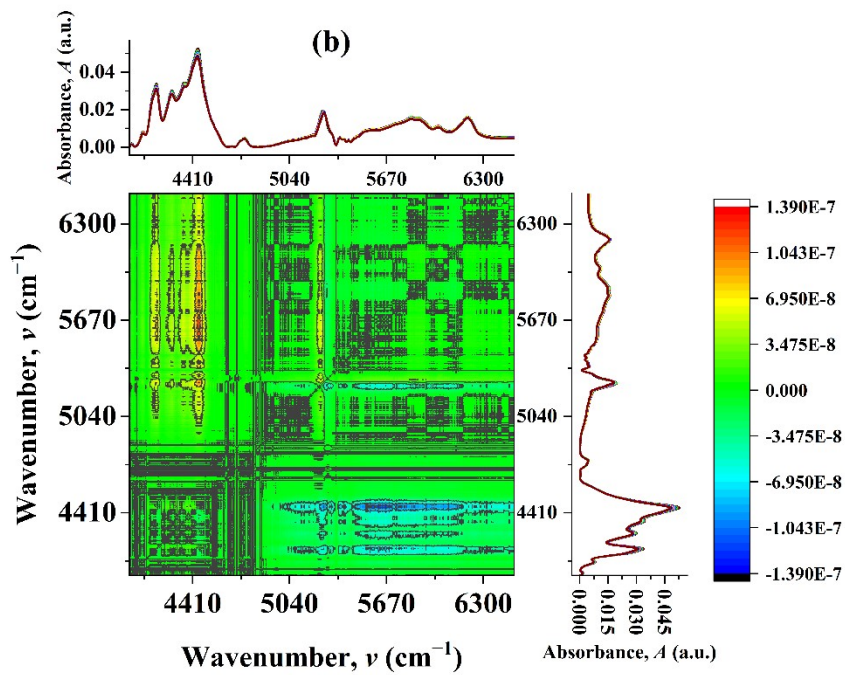

**Fig. S13** Temperature-dependent (a) synchronous and (b) asynchronous 2D correlation spectra of pure  $[C_4mim]BF_4$ .

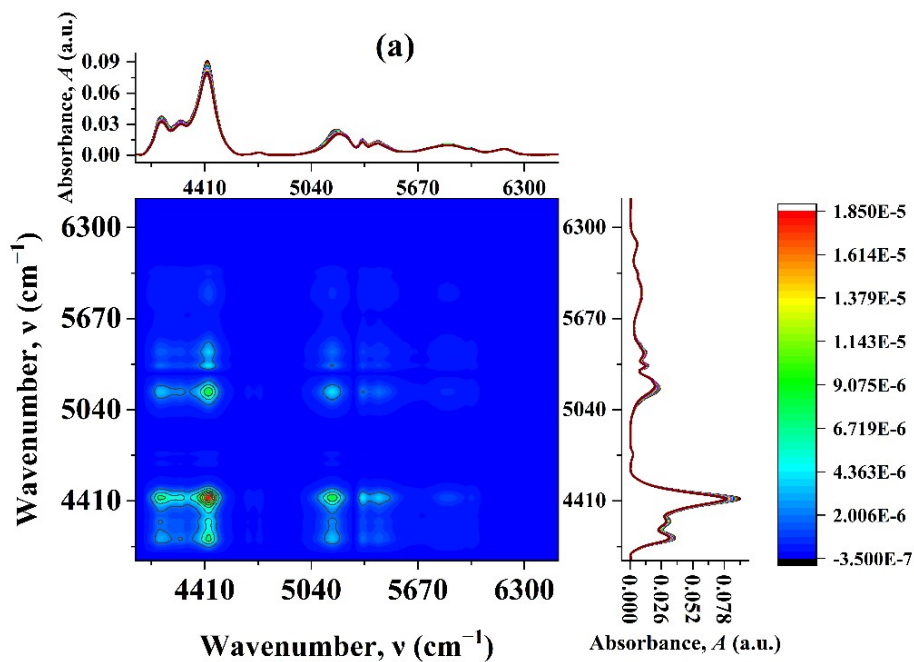

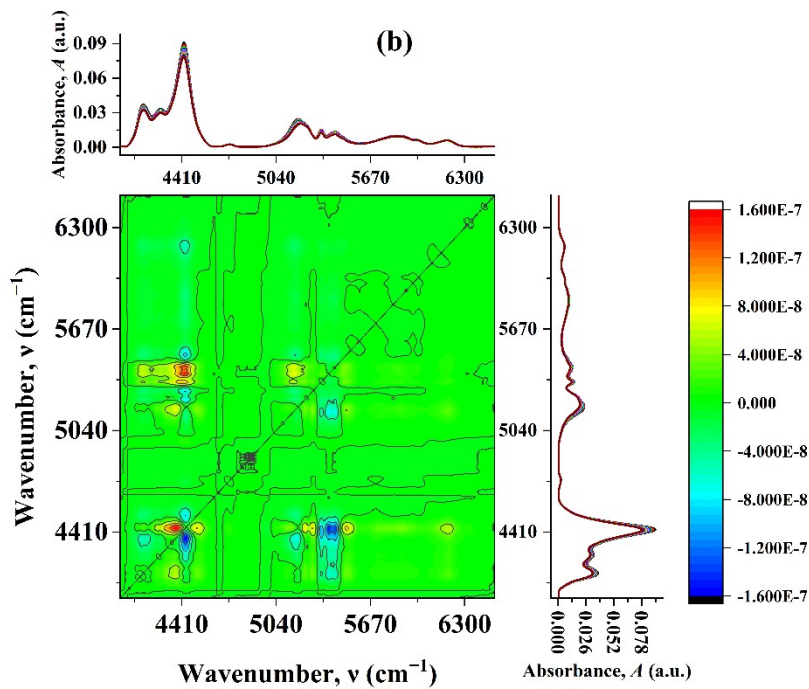

**Fig. S14** Temperature-dependent (a) synchronous and (b) asynchronous 2D correlation spectra of pure  $[C_4mim][MeSO_4]$ .

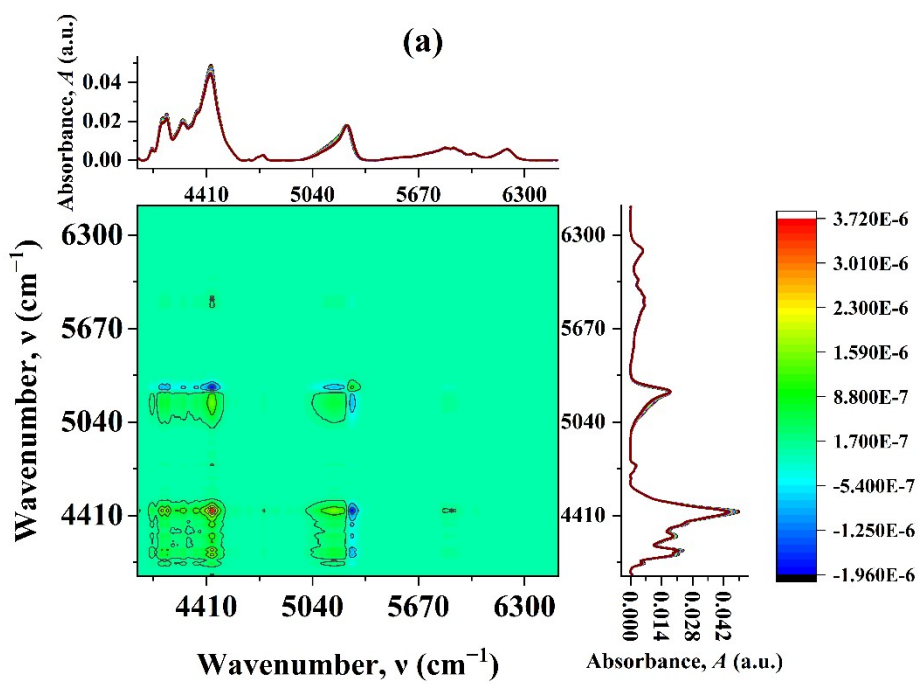

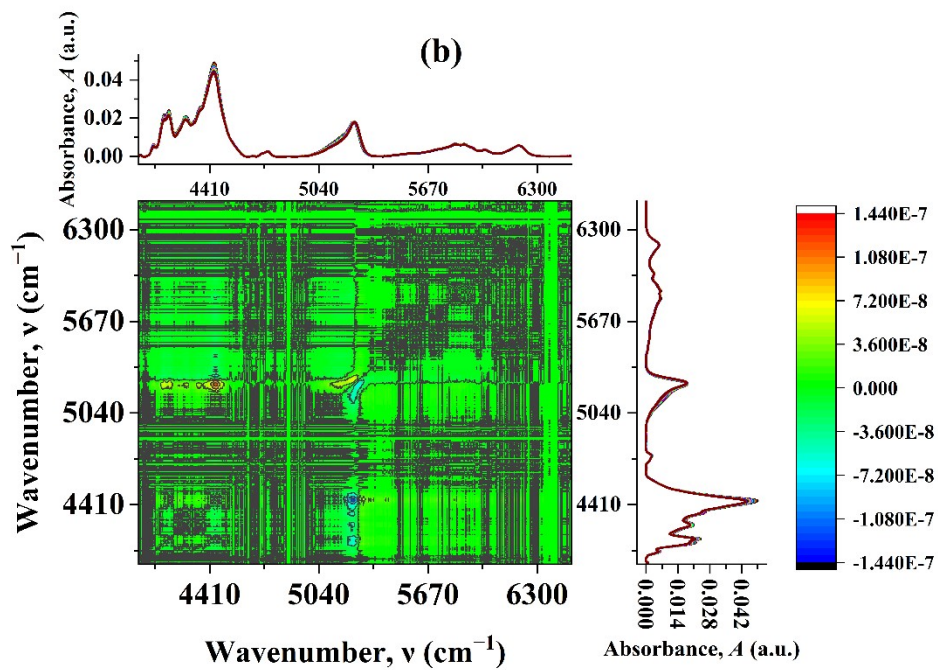

**Fig. S15** Temperature-dependent (a) synchronous and (b) asynchronous 2D correlation spectra of pure  $[C_4mim](BF_4)_{0.5}[MeSO_4]_{0.5}$ .

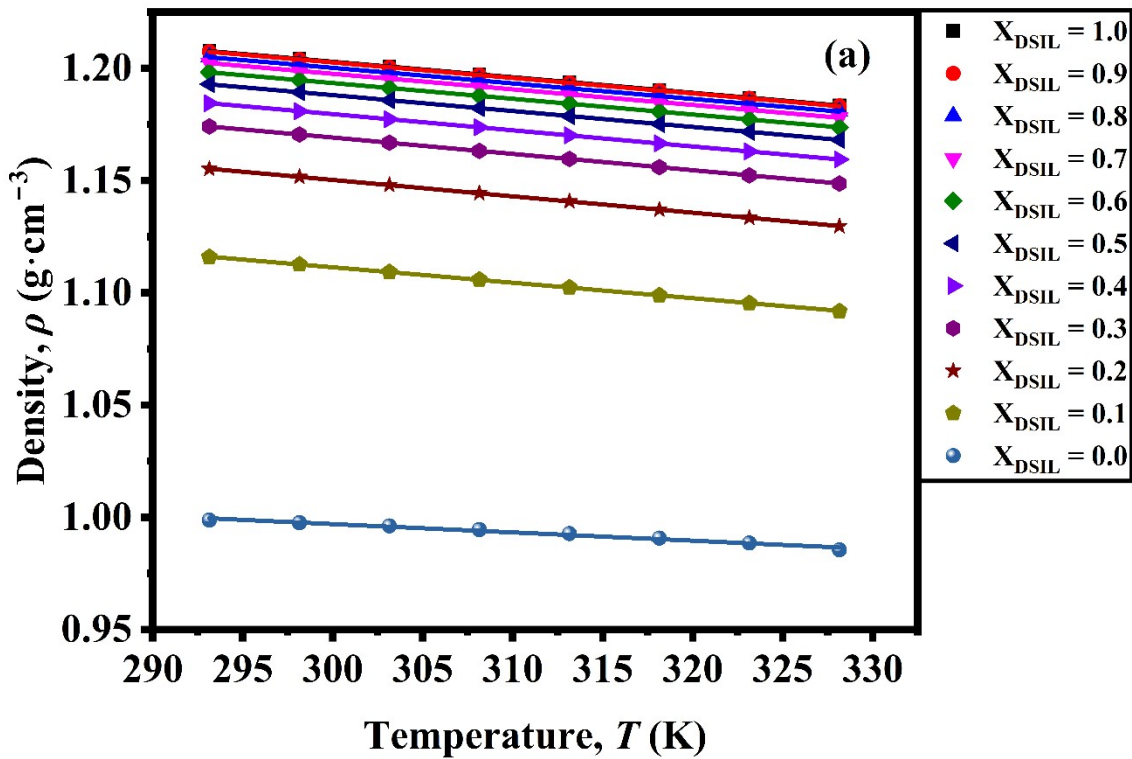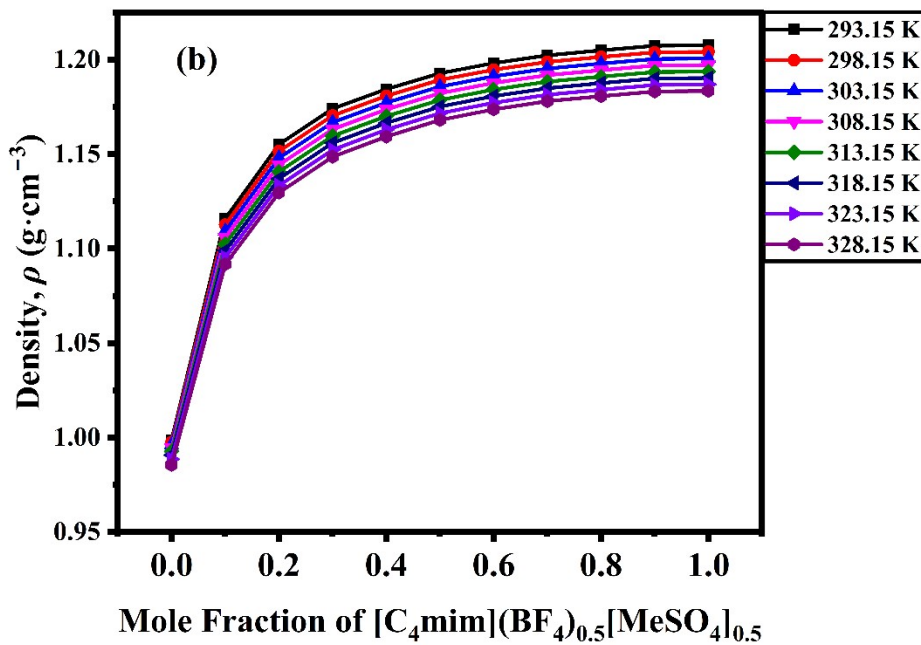

**Fig. S16** Density as a function of (a) temperature and (b) mole fraction for  $[\text{C}_4\text{mim}](\text{BF}_4)_{0.5}[\text{MeSO}_4]_{0.5}$  and water binary mixtures.

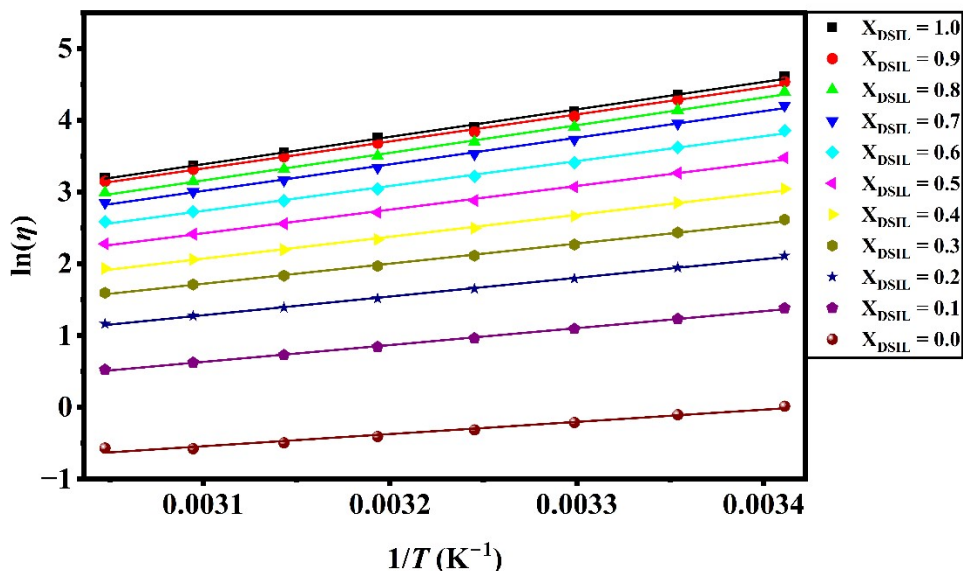

**Fig. S17** Arrhenius plot of  $\ln(\eta)$  versus  $1/T$  for DSIL,  $[C_4mim](BF_4)_{0.5}[MeSO_4]_{0.5}$ -water binary mixtures showing linear behavior over the studied temperature range and corresponding regression fits.

**Table S3.** Arrhenius fitting parameters (intercept and slope) and corresponding coefficients of determination ( $R^2$ ) obtained from linear regression of  $\ln(\eta)$  versus  $1/T$  for  $[C_4mim](BF_4)_{0.5}[MeSO_4]_{0.5}$ -water binary mixtures

| $X_{DSIL}$ | Intercept | Slope    | $R^2$ |
|------------|-----------|----------|-------|
| 1.0        | -8.457    | 3821.252 | 0.997 |
| 0.9        | -8.335    | 3762.926 | 0.997 |
| 0.8        | -8.766    | 3848.134 | 0.997 |
| 0.7        | -8.467    | 3704.680 | 0.997 |
| 0.6        | -8.008    | 3467.086 | 0.996 |
| 0.5        | -7.795    | 3297.423 | 0.997 |
| 0.4        | -7.380    | 3049.440 | 0.997 |
| 0.3        | -6.951    | 2798.375 | 0.998 |
| 0.2        | -6.788    | 2604.343 | 0.998 |
| 0.1        | -6.670    | 2356.289 | 0.998 |
| 0.0        | -5.807    | 1698.961 | 0.974 |

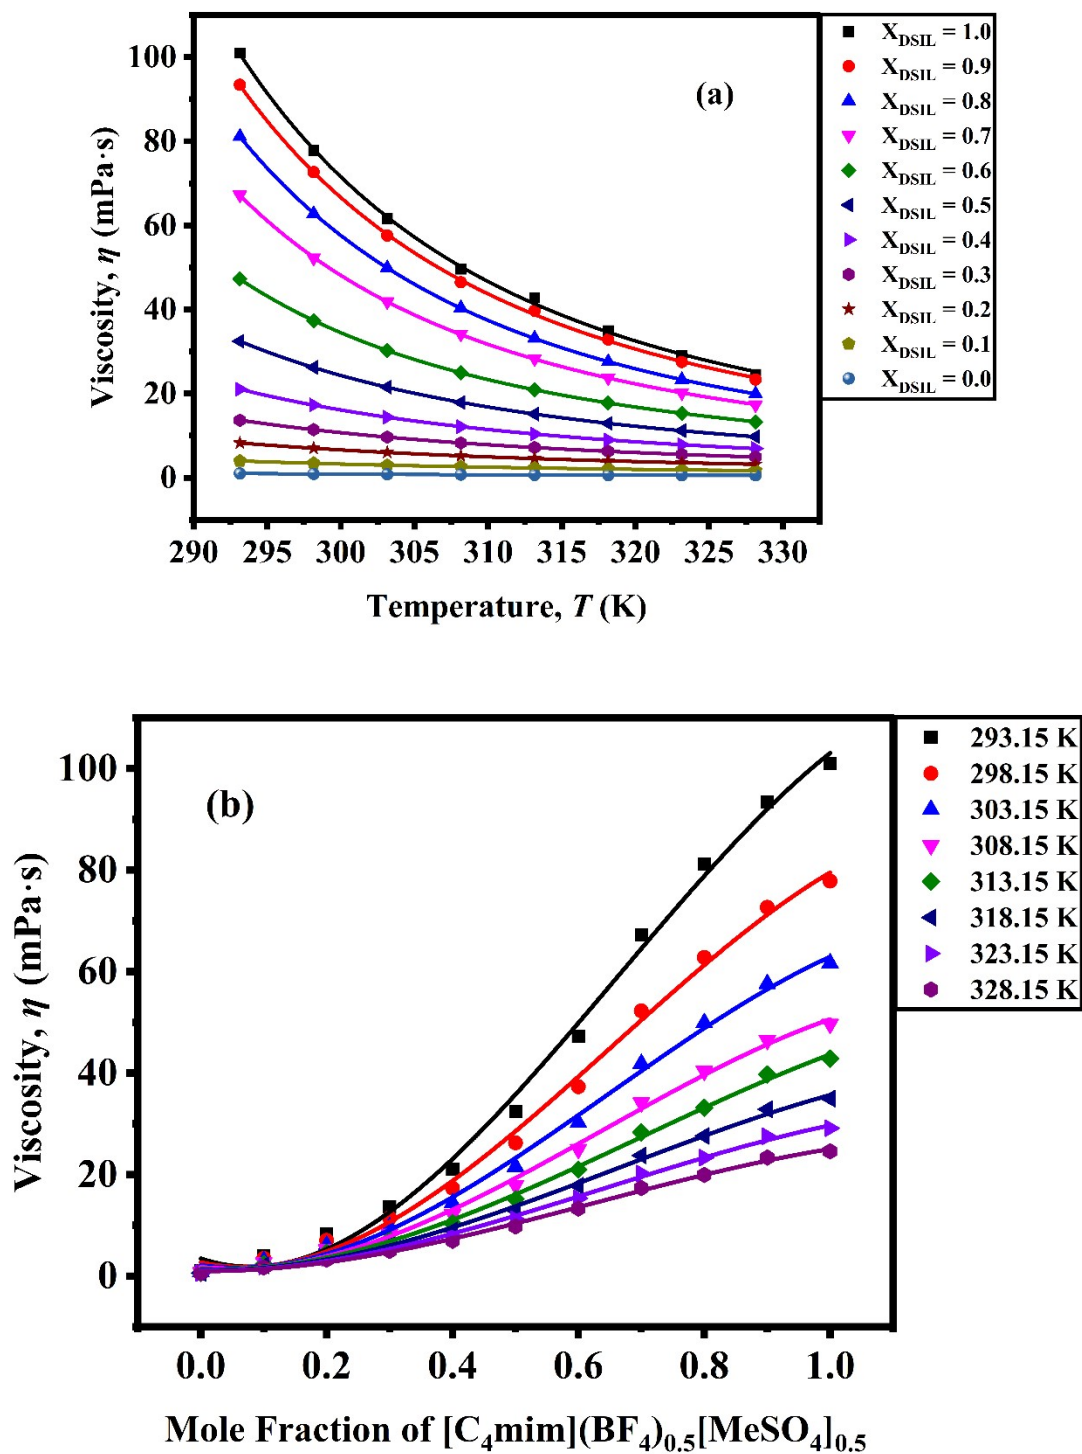

Fig. S18 Viscosity as a function of (a) temperature with VFT fitting and (b) mole fraction for  $[\text{C}_4\text{mim}](\text{BF}_4)_{0.5}[\text{MeSO}_4]_{0.5}$ -water mixtures.

**Table S4.** Vogel–Fulcher–Tammann (VFT) fitting parameters ( $A$ ,  $B$ , and  $x_0$ ) and corresponding coefficients of determination ( $R^2$ ) obtained from fitting the temperature dependence of viscosity ( $\eta$ ) for  $[C_4mim](BF_4)_{0.5}[MeSO_4]_{0.5}$ -water binary mixtures

| $X_{DSIL}$ | $A$    | $B$     | $x_0$   | $R^2$ |
|------------|--------|---------|---------|-------|
| 1.0        | -0.317 | 232.191 | 193.095 | 0.999 |
| 0.9        | -0.354 | 237.091 | 191.134 | 0.999 |
| 0.8        | -0.576 | 267.942 | 185.340 | 1.000 |
| 0.7        | -0.440 | 227.693 | 192.749 | 1.000 |
| 0.6        | -0.411 | 204.108 | 195.242 | 1.000 |
| 0.5        | -0.748 | 262.889 | 176.792 | 1.000 |
| 0.4        | -0.776 | 245.892 | 176.043 | 1.000 |
| 0.3        | -0.818 | 233.373 | 173.758 | 1.000 |
| 0.2        | -1.041 | 257.268 | 161.799 | 1.000 |
| 0.1        | -1.126 | 219.699 | 166.002 | 1.000 |
| 0.0        | -0.762 | 49.574  | 228.851 | 0.992 |

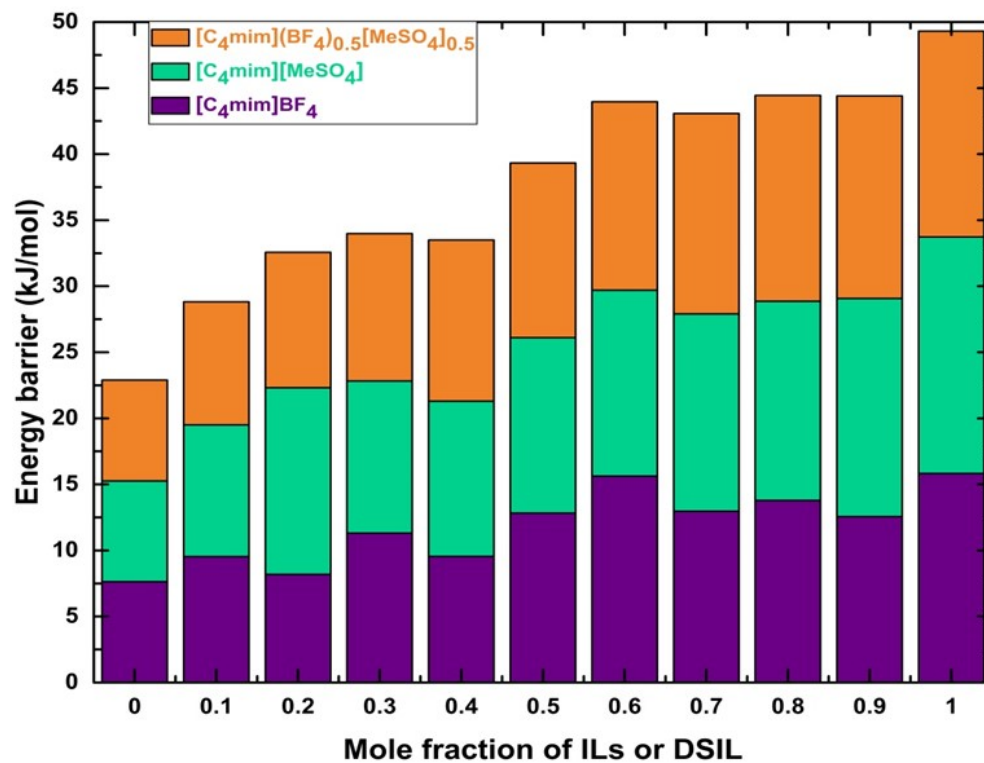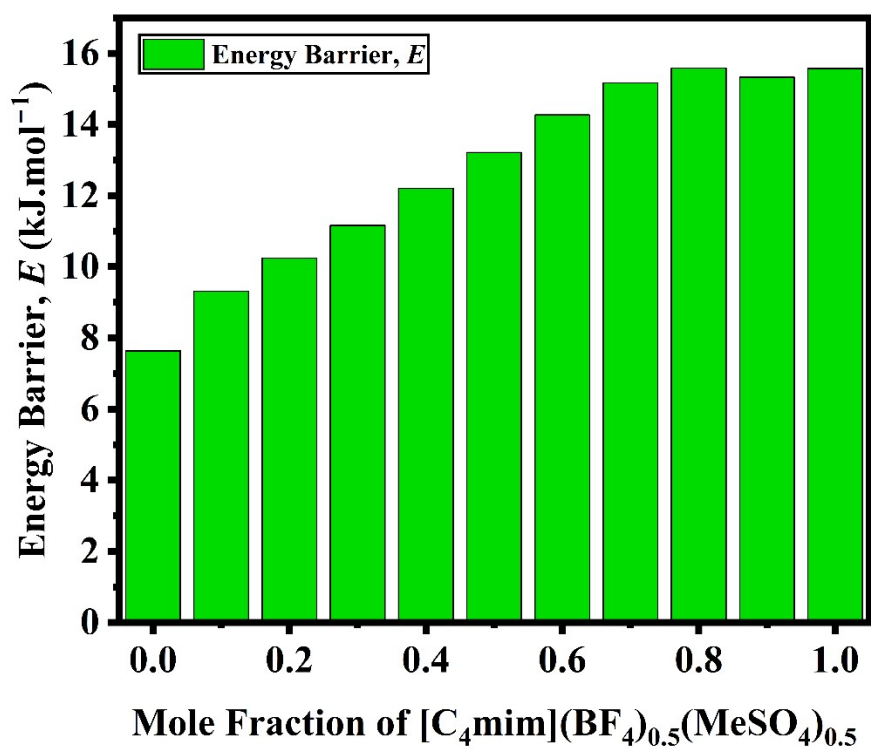

Fig. S19 Calculated energy barrier for DSIL and its component ILs.

**Table S5.** Experimental densities ( $\rho$ ), dynamic viscosities ( $\eta$ ), calculated  $V_m^E$ , partial molar volume ( $V_{m,1}$ ), and viscosity deviation ( $\Delta\eta$ ) for  $[C_4mim](BF_4)_{0.5}[MeSO_4]_{0.5}$ -water binary mixtures at different temperatures

| $x_{water}$      | $\rho$<br>(g.cm <sup>-3</sup> ) | $V_m^E$<br>(cm <sup>3</sup> .mol <sup>-1</sup> ) | $V_{m,1}$<br>(cm <sup>3</sup> .mol <sup>-1</sup> ) | $\eta$<br>(mPa.s) | $\Delta\eta$<br>(mPa.s) |
|------------------|---------------------------------|--------------------------------------------------|----------------------------------------------------|-------------------|-------------------------|
| <i>T</i> = 293 K |                                 |                                                  |                                                    |                   |                         |
| 0.0000           | 1.20771                         | 0.00000                                          | 197.20710                                          | 101.0000          | 0.0000                  |
| 0.1039           | 1.20742                         | -0.26917                                         | 197.06867                                          | 93.4100           | 2.4083                  |
| 0.2064           | 1.20499                         | -0.26147                                         | 196.98117                                          | 81.1600           | 0.1567                  |
| 0.3015           | 1.20238                         | -0.30471                                         | 196.91283                                          | 67.2500           | -3.7550                 |
| 0.4048           | 1.19826                         | -0.26843                                         | 196.81731                                          | 47.2500           | -13.7566                |
| 0.4998           | 1.19290                         | -0.24403                                         | 196.66607                                          | 32.4700           | -18.5383                |
| 0.6057           | 1.18447                         | -0.14963                                         | 196.90147                                          | 21.0400           | -19.9700                |
| 0.7028           | 1.17409                         | -0.19203                                         | 197.06012                                          | 13.6900           | -17.3216                |
| 0.7989           | 1.15521                         | -0.16250                                         | 196.60868                                          | 8.2800            | -12.7333                |
| 0.9035           | 1.11592                         | -0.08305                                         | 196.39280                                          | 3.9930            | -7.0219                 |
| 1.0000           | 0.99871                         | 0.00000                                          | -                                                  | 1.0166            | 0.0000                  |
| <i>T</i> = 298 K |                                 |                                                  |                                                    |                   |                         |
| 0.0000           | 1.20421                         | 0.00000                                          | 197.78030                                          | 77.8500           | 0.0000                  |
| 0.1039           | 1.20392                         | -0.26667                                         | 197.64105                                          | 72.6600           | 2.5046                  |
| 0.2064           | 1.20149                         | -0.25484                                         | 197.55305                                          | 62.7900           | 0.3292                  |
| 0.3015           | 1.19888                         | -0.29426                                         | 197.48115                                          | 52.2700           | -2.4962                 |
| 0.4048           | 1.19474                         | -0.25158                                         | 197.38122                                          | 37.3300           | -9.7416                 |
| 0.4998           | 1.18935                         | -0.22051                                         | 197.23244                                          | 26.2300           | -13.1470                |

|        |         |          |           |         |          |
|--------|---------|----------|-----------|---------|----------|
| 0.6057 | 1.1809  | -0.12064 | 197.47129 | 17.3200 | -14.3623 |
| 0.7028 | 1.17048 | -0.15772 | 197.64253 | 11.4300 | -12.5577 |
| 0.7989 | 1.15162 | -0.12634 | 197.23512 | 7.0070  | -9.2861  |
| 0.9035 | 1.11263 | -0.05301 | 197.15876 | 3.4360  | -5.1625  |
| 1.0000 | 0.99756 | 0.00000  | -         | 0.9039  | 0.0000   |

*T* = 303 K

|        |         |          |           |         |          |
|--------|---------|----------|-----------|---------|----------|
| 0.0000 | 1.20072 | 0.00000  | 198.35510 | 61.6600 | 0.0000   |
| 0.1039 | 1.20043 | -0.26461 | 198.21504 | 57.6000 | 2.0249   |
| 0.2064 | 1.19800 | -0.24909 | 198.12531 | 49.9100 | 0.4198   |
| 0.3015 | 1.19538 | -0.28391 | 198.04746 | 41.8700 | -1.5352  |
| 0.4048 | 1.19120 | -0.23327 | 197.95043 | 30.2300 | -7.0903  |
| 0.4998 | 1.18580 | -0.19821 | 197.80346 | 21.5700 | -9.6654  |
| 0.6057 | 1.17731 | -0.09190 | 198.04585 | 14.3800 | -10.7705 |
| 0.7028 | 1.16687 | -0.12576 | 198.23036 | 9.6720  | -9.3936  |
| 0.7989 | 1.14801 | -0.09219 | 197.85859 | 6.0200  | -6.9606  |
| 0.9035 | 1.10928 | -0.02468 | 197.91556 | 2.9890  | -3.9067  |
| 1.0000 | 0.99616 | 0.00000  | -         | 0.8108  | 0.0000   |

*T* = 308 K

|        |         |          |           |         |         |
|--------|---------|----------|-----------|---------|---------|
| 0.0000 | 1.19725 | 0.00000  | 198.93000 | 49.6400 | 0.0000  |
| 0.1039 | 1.19695 | -0.26144 | 198.79064 | 46.4900 | 1.7407  |
| 0.2064 | 1.19453 | -0.24415 | 198.69675 | 40.4100 | 0.5515  |
| 0.3015 | 1.19188 | -0.27234 | 198.61940 | 34.1400 | -0.8278 |
| 0.4048 | 1.18770 | -0.21864 | 198.52056 | 25.0000 | -5.0770 |
| 0.4998 | 1.18226 | -0.17694 | 198.36441 | 17.8900 | -7.2963 |

|        |         |          |           |         |         |
|--------|---------|----------|-----------|---------|---------|
| 0.6057 | 1.17371 | -0.06318 | 198.61626 | 12.1600 | -8.1356 |
| 0.7028 | 1.16323 | -0.09342 | 198.82300 | 8.2860  | -7.1188 |
| 0.7989 | 1.14438 | -0.05930 | 198.48666 | 5.2160  | -5.2981 |
| 0.9035 | 1.10587 | 0.00259  | 198.66574 | 2.6230  | -3.0003 |
| 1.0000 | 0.99454 | 0.00000  | -         | 0.7326  | 0.0000  |

*T* = 313 K

|        |         |          |           |         |         |
|--------|---------|----------|-----------|---------|---------|
| 0.0000 | 1.19379 | 0.00000  | 199.50660 | 42.8600 | 0.0000  |
| 0.1039 | 1.19349 | -0.26012 | 199.36574 | 39.7400 | 1.0993  |
| 0.2064 | 1.19106 | -0.23852 | 199.27092 | 33.1800 | -1.2414 |
| 0.3015 | 1.18840 | -0.26296 | 199.19224 | 28.3000 | -1.9020 |
| 0.4048 | 1.18420 | -0.20425 | 199.08913 | 20.9700 | -5.0127 |
| 0.4998 | 1.17872 | -0.15635 | 198.93240 | 15.1200 | -6.6434 |
| 0.6057 | 1.17013 | -0.03711 | 199.19406 | 10.3800 | -7.1641 |
| 0.7028 | 1.15962 | -0.06454 | 199.40860 | 7.1730  | -6.1518 |
| 0.7989 | 1.14073 | -0.02755 | 199.10693 | 4.5620  | -4.5434 |
| 0.9035 | 1.10242 | 0.02849  | 199.41112 | 2.3260  | -2.5601 |
| 1.0000 | 0.99273 | 0.00000  | -         | 0.6668  | 0.0000  |

*T* = 318 K

|        |         |          |           |         |         |
|--------|---------|----------|-----------|---------|---------|
| 0.0000 | 1.19036 | 0.00000  | 200.08150 | 34.9800 | 0.0000  |
| 0.1039 | 1.19005 | -0.25766 | 199.94067 | 32.8700 | 1.3269  |
| 0.2064 | 1.18762 | -0.23366 | 199.84491 | 27.5900 | -0.5161 |
| 0.3015 | 1.18495 | -0.25473 | 199.76012 | 23.7700 | -0.8992 |
| 0.4048 | 1.18071 | -0.18923 | 199.65435 | 17.8000 | -3.4323 |
| 0.4998 | 1.17519 | -0.13577 | 199.49808 | 12.9400 | -4.8554 |

|        |         |          |           |        |         |
|--------|---------|----------|-----------|--------|---------|
| 0.6057 | 1.16654 | -0.01017 | 199.76377 | 8.9960 | -5.3624 |
| 0.7028 | 1.15596 | -0.03325 | 200.00016 | 6.2770 | -4.6445 |
| 0.7989 | 1.13706 | 0.00357  | 199.73799 | 4.0230 | -3.4616 |
| 0.9035 | 1.09892 | 0.05352  | 200.15108 | 2.0760 | -1.9716 |
| 1.0000 | 0.99072 | 0.00000  | -         | 0.6107 | 0.0000  |

*T* = 323 K

|        |         |          |           |         |         |
|--------|---------|----------|-----------|---------|---------|
| 0.0000 | 1.18692 | 0.00000  | 200.66140 | 29.1300 | 0.0000  |
| 0.1039 | 1.18662 | -0.25862 | 200.51822 | 27.5400 | 1.2667  |
| 0.2064 | 1.18418 | -0.23087 | 200.42066 | 23.3100 | -0.1066 |
| 0.3015 | 1.18150 | -0.24875 | 200.33123 | 20.1800 | -0.3799 |
| 0.4048 | 1.17722 | -0.17659 | 200.22281 | 15.3100 | -2.3932 |
| 0.4998 | 1.17166 | -0.11775 | 200.06698 | 11.1900 | -3.6565 |
| 0.6057 | 1.16295 | 0.01408  | 200.34242 | 7.8540  | -4.1357 |
| 0.7028 | 1.15233 | -0.00673 | 200.5916  | 5.5480  | -3.5850 |
| 0.7989 | 1.13338 | 0.03210  | 200.36058 | 3.5770  | -2.6993 |
| 0.9035 | 1.09538 | 0.07650  | 200.88235 | 1.8680  | -1.5516 |
| 1.0000 | 0.98850 | 0.00000  | -         | 0.5629  | 0.0000  |

*T* = 328 K

|        |         |          |           |         |         |
|--------|---------|----------|-----------|---------|---------|
| 0.0000 | 1.18353 | 0.00000  | 201.23610 | 24.5900 | 0.0000  |
| 0.1039 | 1.18322 | -0.25801 | 201.09155 | 23.3500 | 1.1622  |
| 0.2064 | 1.18076 | -0.22692 | 200.99101 | 19.9200 | 0.1343  |
| 0.3015 | 1.17804 | -0.23984 | 200.90263 | 17.3300 | -0.0535 |
| 0.4048 | 1.17373 | -0.16450 | 200.7969  | 13.2900 | -1.6914 |
| 0.4998 | 1.16813 | -0.10249 | 200.63901 | 9.7740  | -2.8052 |

---

|        |         |         |           |        |         |
|--------|---------|---------|-----------|--------|---------|
| 0.6057 | 1.15936 | 0.03334 | 200.91862 | 6.9390 | -3.2380 |
| 0.7028 | 1.14867 | 0.01445 | 201.18499 | 4.9390 | -2.8359 |
| 0.7989 | 1.12968 | 0.05207 | 200.99161 | 3.2050 | -2.1677 |
| 0.9035 | 1.09181 | 0.08859 | 201.55901 | 1.6930 | -1.2776 |
| 1.0000 | 0.98550 | 0.00000 | -         | 0.5684 | 0.0000  |

---

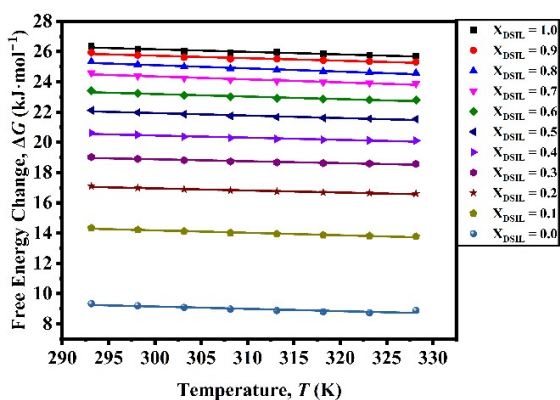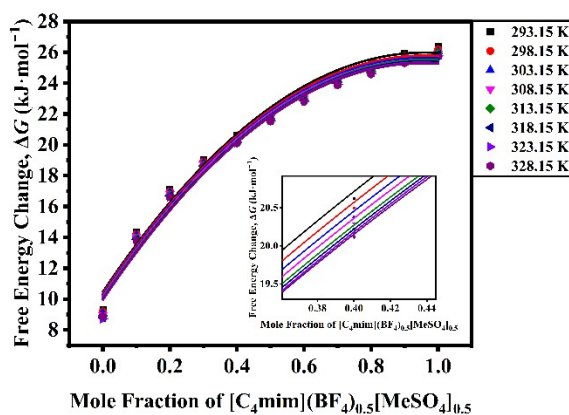

(a)

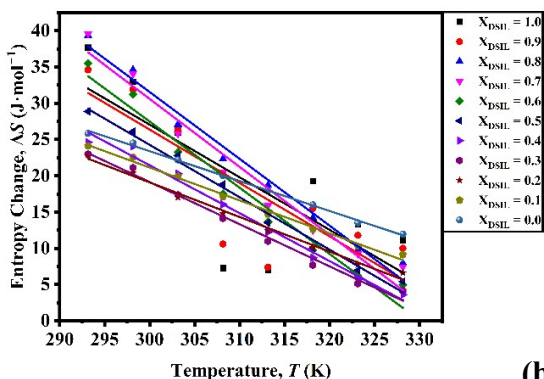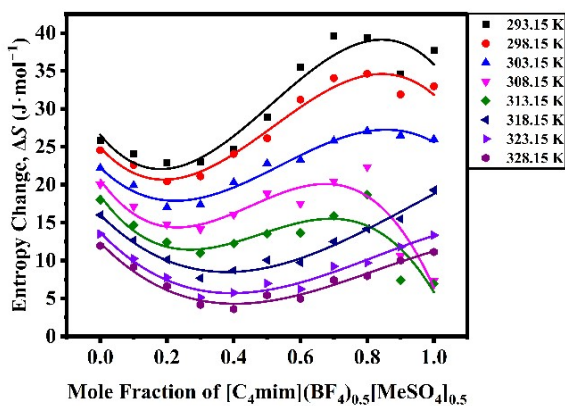

(b)

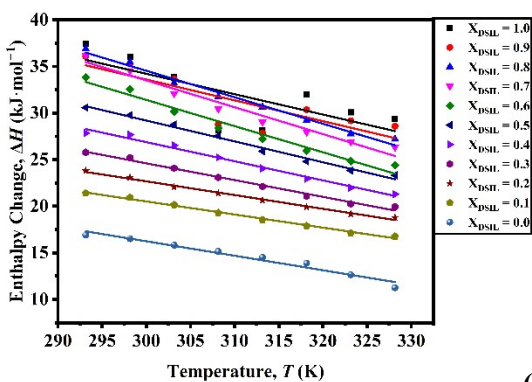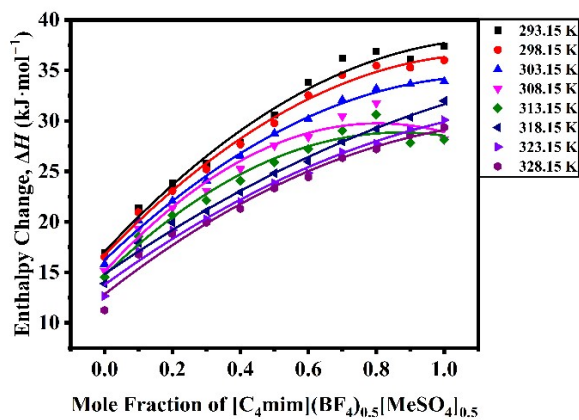

(c)

**Fig. S20** (a) Free energy, (b) entropy, and (c) enthalpy changes of activation for viscous flow as a function of temperature and mole fraction for the binary mixtures of water and  $[C_4mim](BF_4)_{0.5}[MeSO_4]_{0.5}$ .

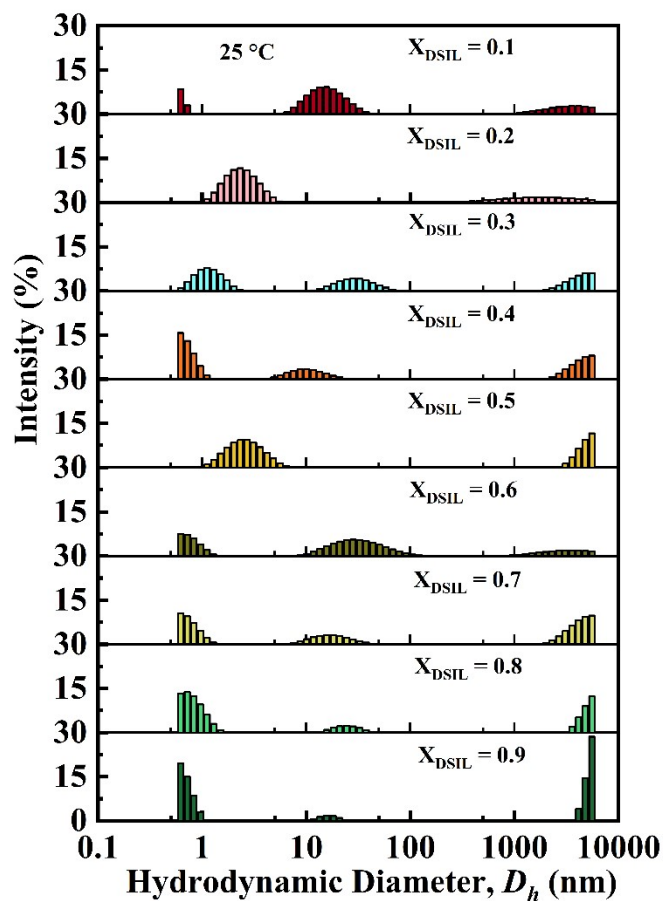

**Fig. S21** Size distribution of aggregates formed in  $[C_4mim](BF_4)_{0.5}[MeSO_4]_{0.5}$ -water binary mixture from  $X_{DSIL} = 0.9$  to 0.1 at 25 °C.

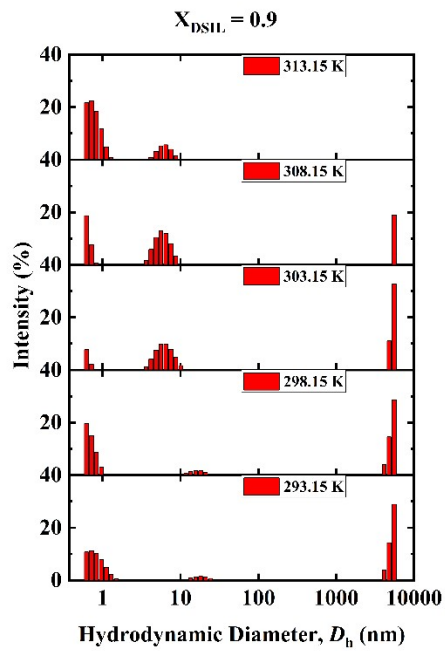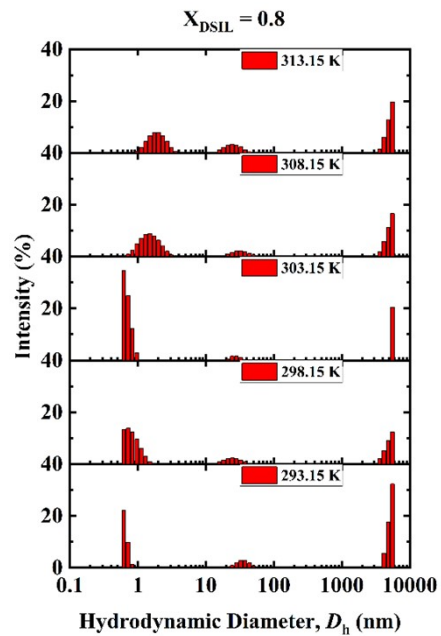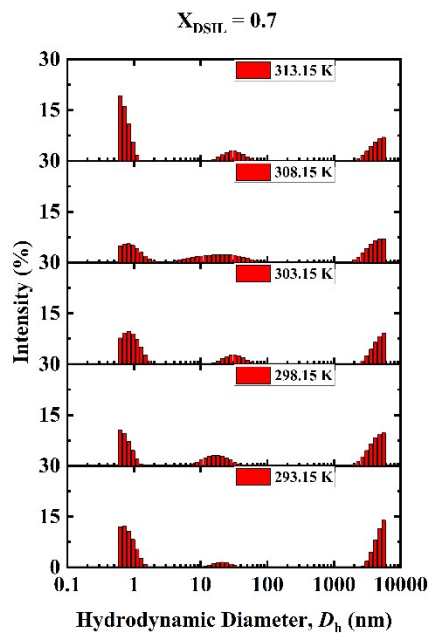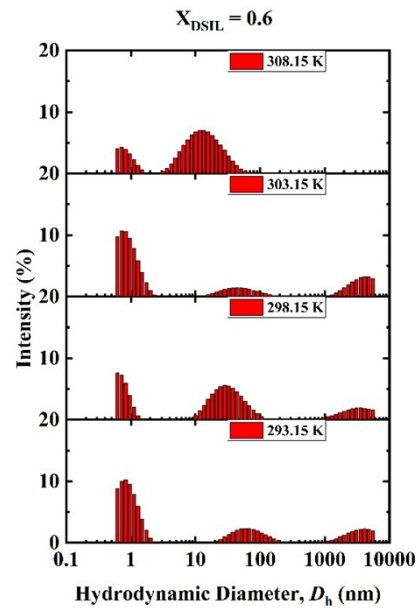

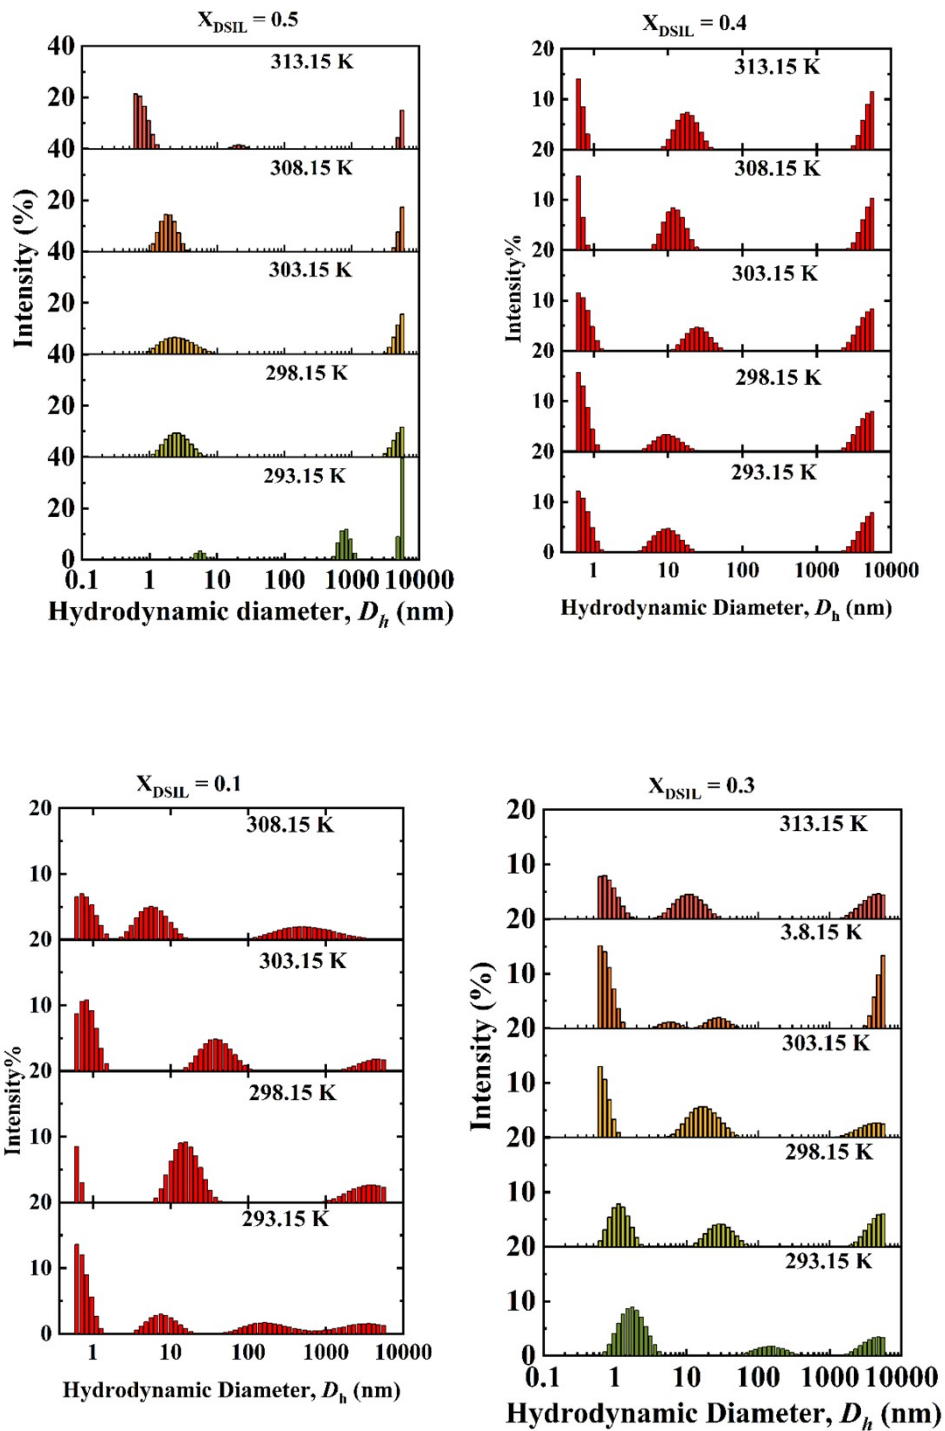

**Fig. S22** Size distribution of aggregates formed in  $[C_4mim](BF_4)_{0.5}[MeSO_4]_{0.5}$ -water binary mixture for  $X_{DSIL} = 0.9, 0.8, 0.7, 0.6, 0.5, 0.4, 0.3,$  and  $0.1$  at several temperatures from 20 to 40 °C.

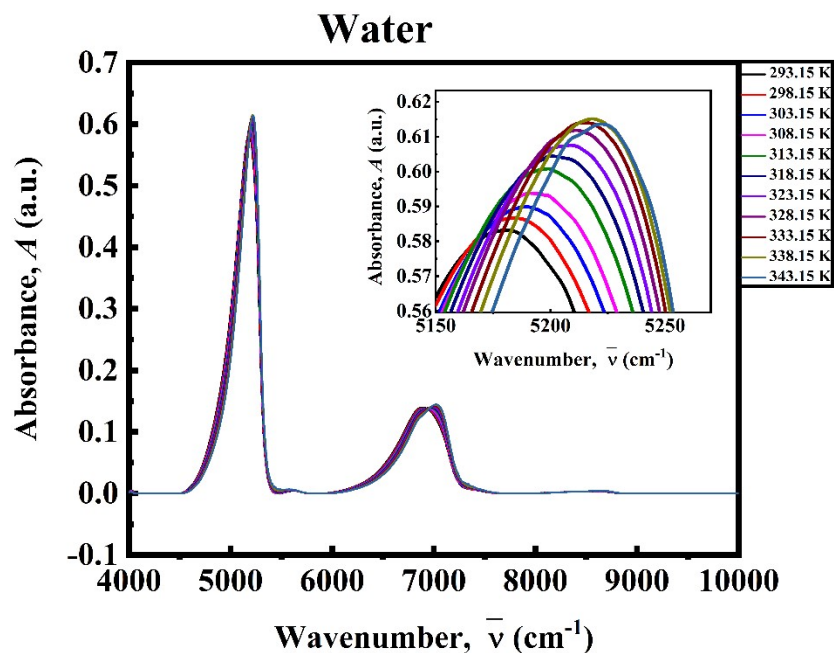

Fig. S23 NIR spectra of pure water from 20 to 70 °C.

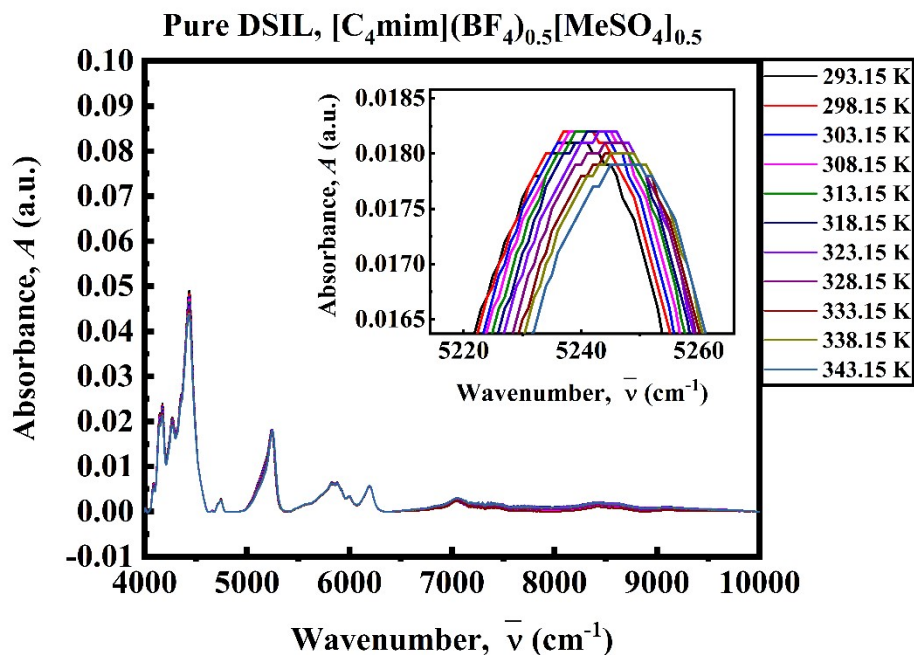

Fig. S24 NIR spectra of pure  $[C_4mim](BF_4)_{0.5}[MeSO_4]_{0.5}$  from 20 to 70 °C.

## Section S1

### 2D Correlation Analysis of Pure Water

The NIR spectra of water reveal that the absorption maxima rise progressively with increasing temperature, accompanied by a shift of the band toward higher frequencies. The amplification of band intensity upon increasing temperature arises from a higher concentration of free –OH groups in the equilibrium state. Moreover, the shift toward higher frequency suggests that the molecular vibrational modes require greater energy for excitation. This behavior arises because increasing temperature weakens intermolecular hydrogen bonds, thereby strengthening the covalent –OH bonds and causing their vibrations to occur at higher frequencies. To analyze the changing pattern of absorbance of different types of water species with temperature in detail, synchronous and asynchronous 2D correlation diagrams are generated from the dynamic spectrum of pure water. **Fig. S25** (a) and (b) exhibit the synchronous and asynchronous plots, respectively, of the 2D correlation analysis of the 4500-6000  $\text{cm}^{-1}$  range.

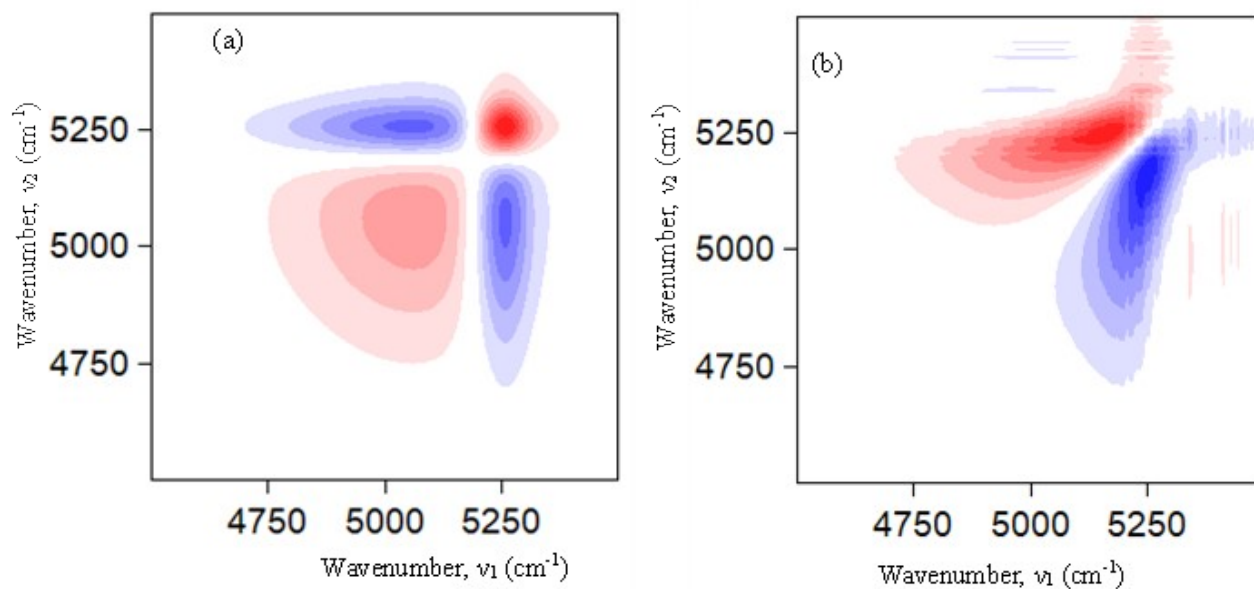

**Fig. S25** (a) Synchronous and (b) asynchronous plot for pure water.

Autopeaks appearing at 5050 and 5254  $\text{cm}^{-1}$  in the synchronous map indicate that the spectral changes at these positions are in phase. The dominant contribution to the declining intensity is observed near 5050  $\text{cm}^{-1}$ , while the spectral peak at 5254  $\text{cm}^{-1}$  strengthens progressively with increasing temperature. Negative cross-peaks between the autopeaks, together with their signs, suggest that the related spectral variations are negatively correlated. The asynchronous correlation spectrum exhibits maximum and minimum signals at 5254 and 5162  $\text{cm}^{-1}$ , respectively, suggesting that the spectral variations are out of phase and that the transition at 5254  $\text{cm}^{-1}$  occurs prior to or more quickly than at 5162  $\text{cm}^{-1}$ . The synchronous plot shows that two principal spectral variations occur with increasing temperature, representing two different

components, with one transitioning into the other. This observation can be interpreted as a two-state model, where the two spectral positions, 5254 and 5050  $\text{cm}^{-1}$ , reflect weaker and stronger H-bonded structures, respectively.

However, the peak observed at 5162  $\text{cm}^{-1}$  in the asynchronous diagram indicates that a straightforward two-state model is insufficient to explain the structure of water. The band at 5162  $\text{cm}^{-1}$  is a representative of a third intermediate state of water, which is less sensitive to temperature change compared to the other components. Therefore, the structure of water can be explained by a quasi-two-state model from this 2D correlation diagram. The stronger hydrogen bonds of the water species in the lower wavenumber region make the vibrations of the clusters of water, less sensitive to temperature change. Similarly, the weakly H-bonded water species corresponding to the band at 5254  $\text{cm}^{-1}$  are more susceptible to temperature change.

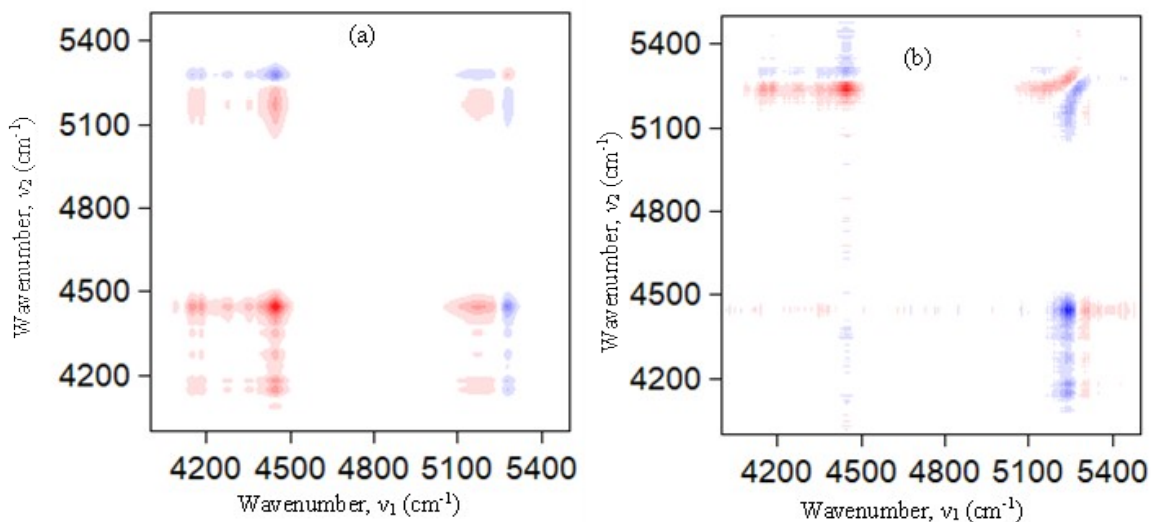

**Fig. S26** (a) Synchronous and (b) asynchronous plot for pure  $[\text{C}_4\text{mim}](\text{BF}_4)_{0.5}[\text{MeSO}_4]_{0.5}$ .

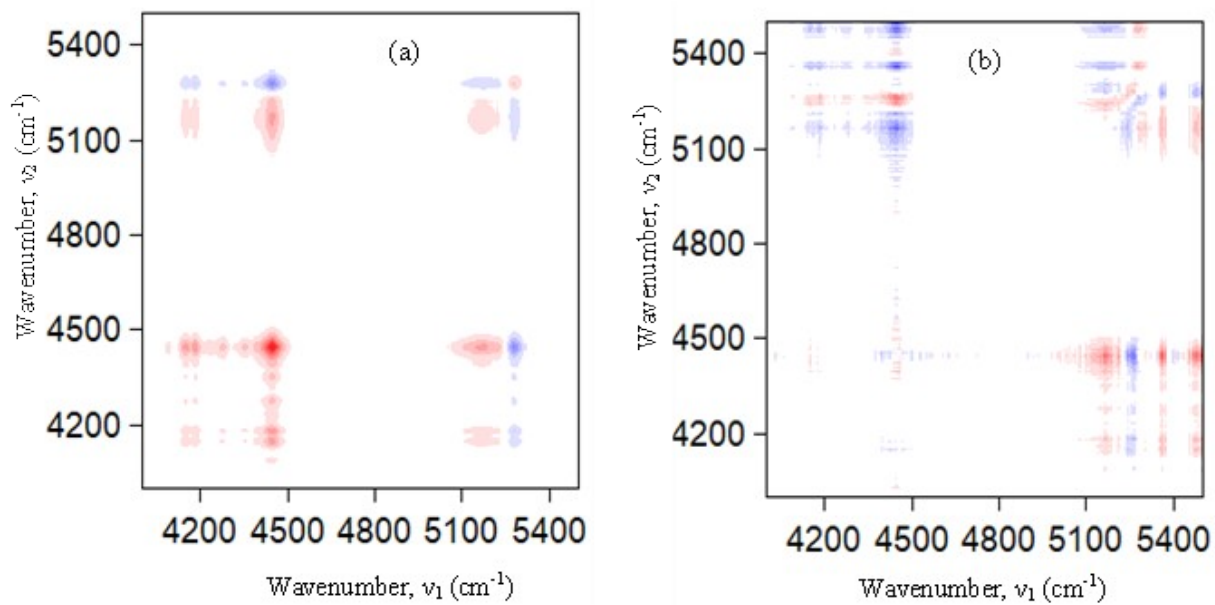

**Fig. S27** (a) Synchronous and (b) asynchronous plot for 0.9  $[C_4mim](BF_4)_{0.5}[MeSO_4]_{0.5}$ -water binary mixture.

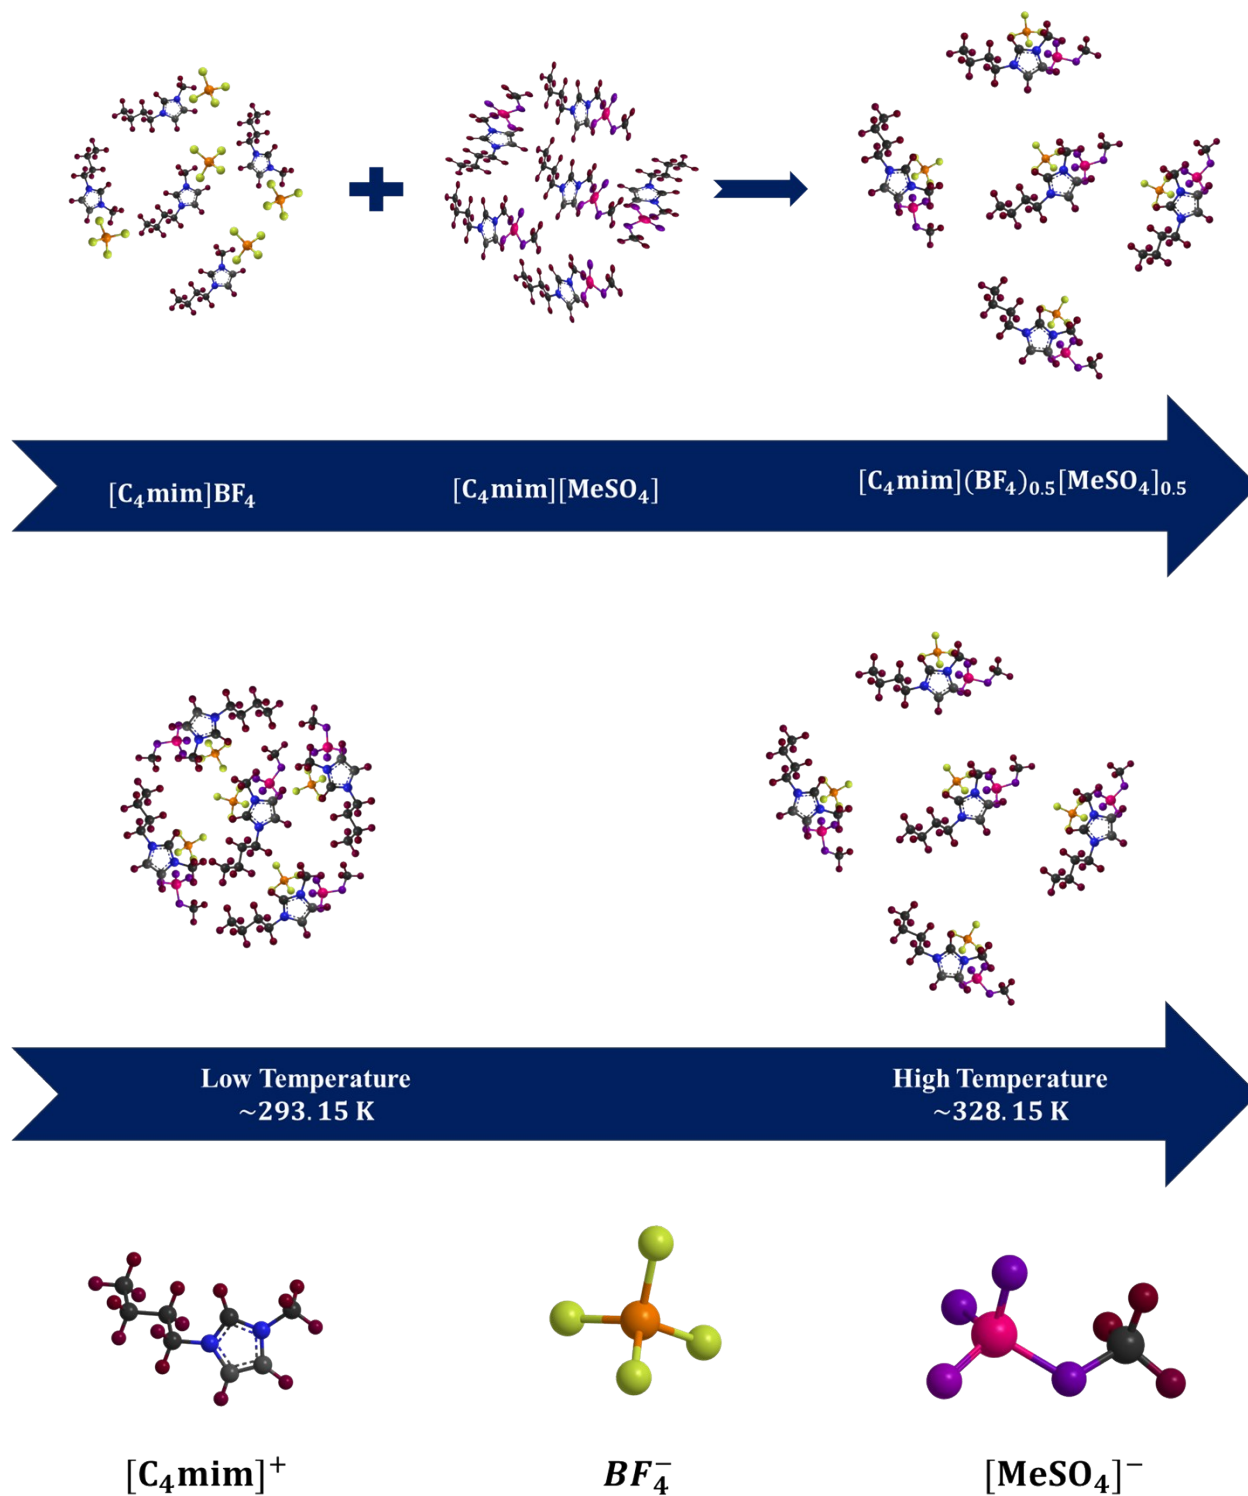

**Fig. S28** Molecular-level interactions when (a) pure ILs are combined to form DSIL and (b) temperature increases gradually for DSIL.
